# Supplementary material
Source: PubMed Central journal article supplement (PMC6382070)

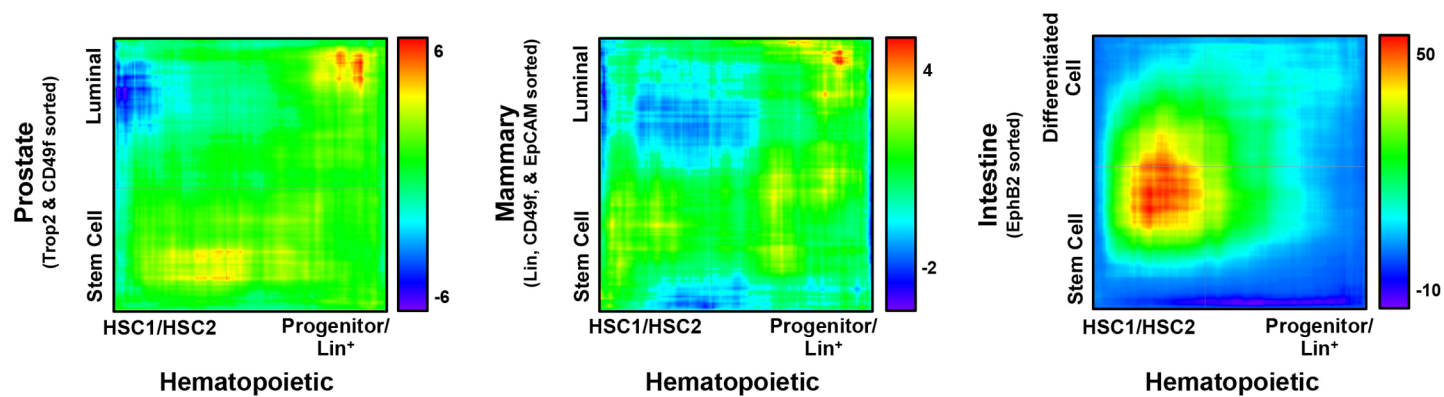

Figure S1. Comparisons of gene expression profiles between the human epithelial and hematopoietic stem cells, Related to Figure 1. Rank-rank hypergeometric heatmap plots of gene expression profile overlap between different cell populations. The quadrant in the lower left hand corner in each plot shows the overlap between the stem cell populations being compared. HSC1/HSC2:  $n = 6$ , Progenitor/Lin+:  $n = 6$ . Heatmap scale bars =  $-\log_{10}$  p-value.

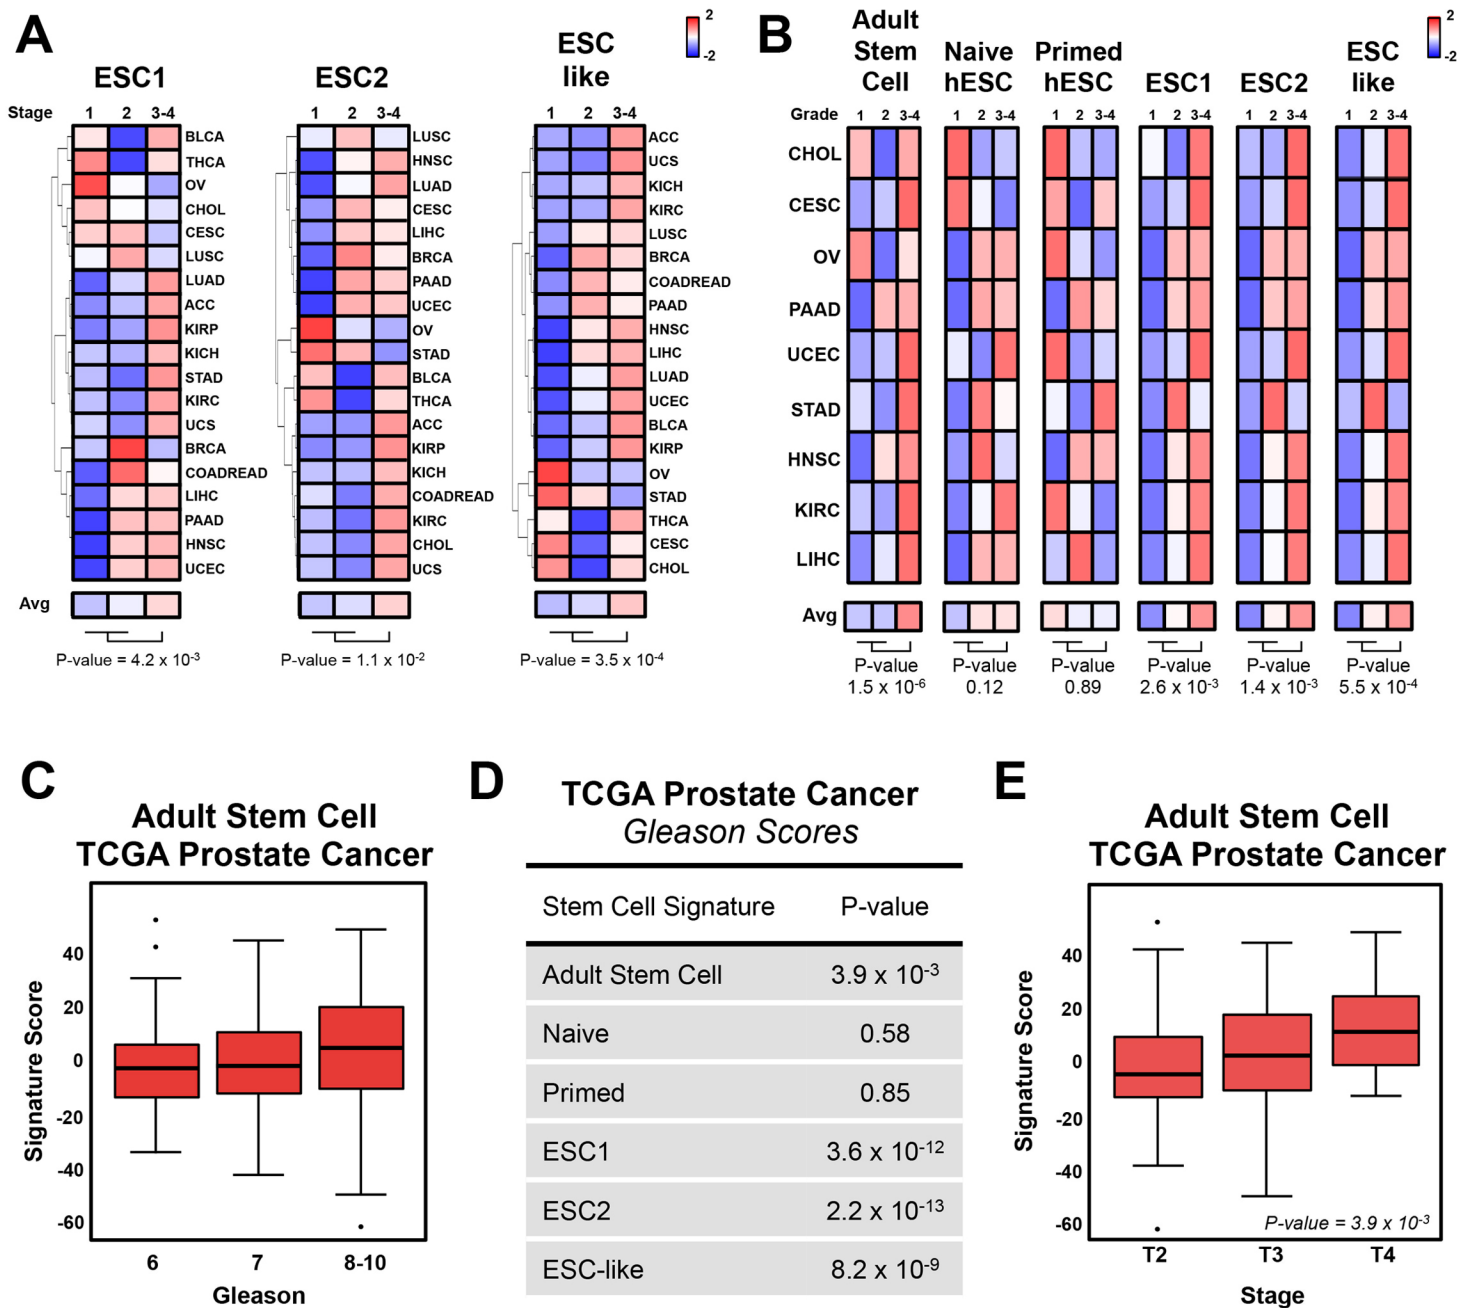

**Figure S2. Comparison of stem cell signature enrichment in epithelial cancers, Related to Figure 2.** (A) Unsupervised clustering of TCGA epithelial cancers according to average stem cell signature scores for each cancer stage. Scale color key is based on z-scores. (B) Heatmap of stem cell signature scores according to average stem cell signature score for each tumor grade. Scale color key is based on z-scores. (C) Box plot of the ASC signature scores for Gleason 6 ( $n = 45$ ), Gleason 7 ( $n = 246$ ), and Gleason 8-10 ( $n = 199$ ) organ-confined prostate adenocarcinomas from the The Cancer Genome Atlas Research Network, 2015. Mean  $\pm$  SD. (D) P-values for stem cell signatures in TCGA prostate adenocarcinoma samples stratified according to Gleason score. P-values were calculated using ANOVA. (E) Box plot of ASC signature scores according to prostate adenocarcinoma staging from The Cancer Genome Atlas Research Network, 2015. Mean  $\pm$  SD. P-value was calculated using ANOVA.

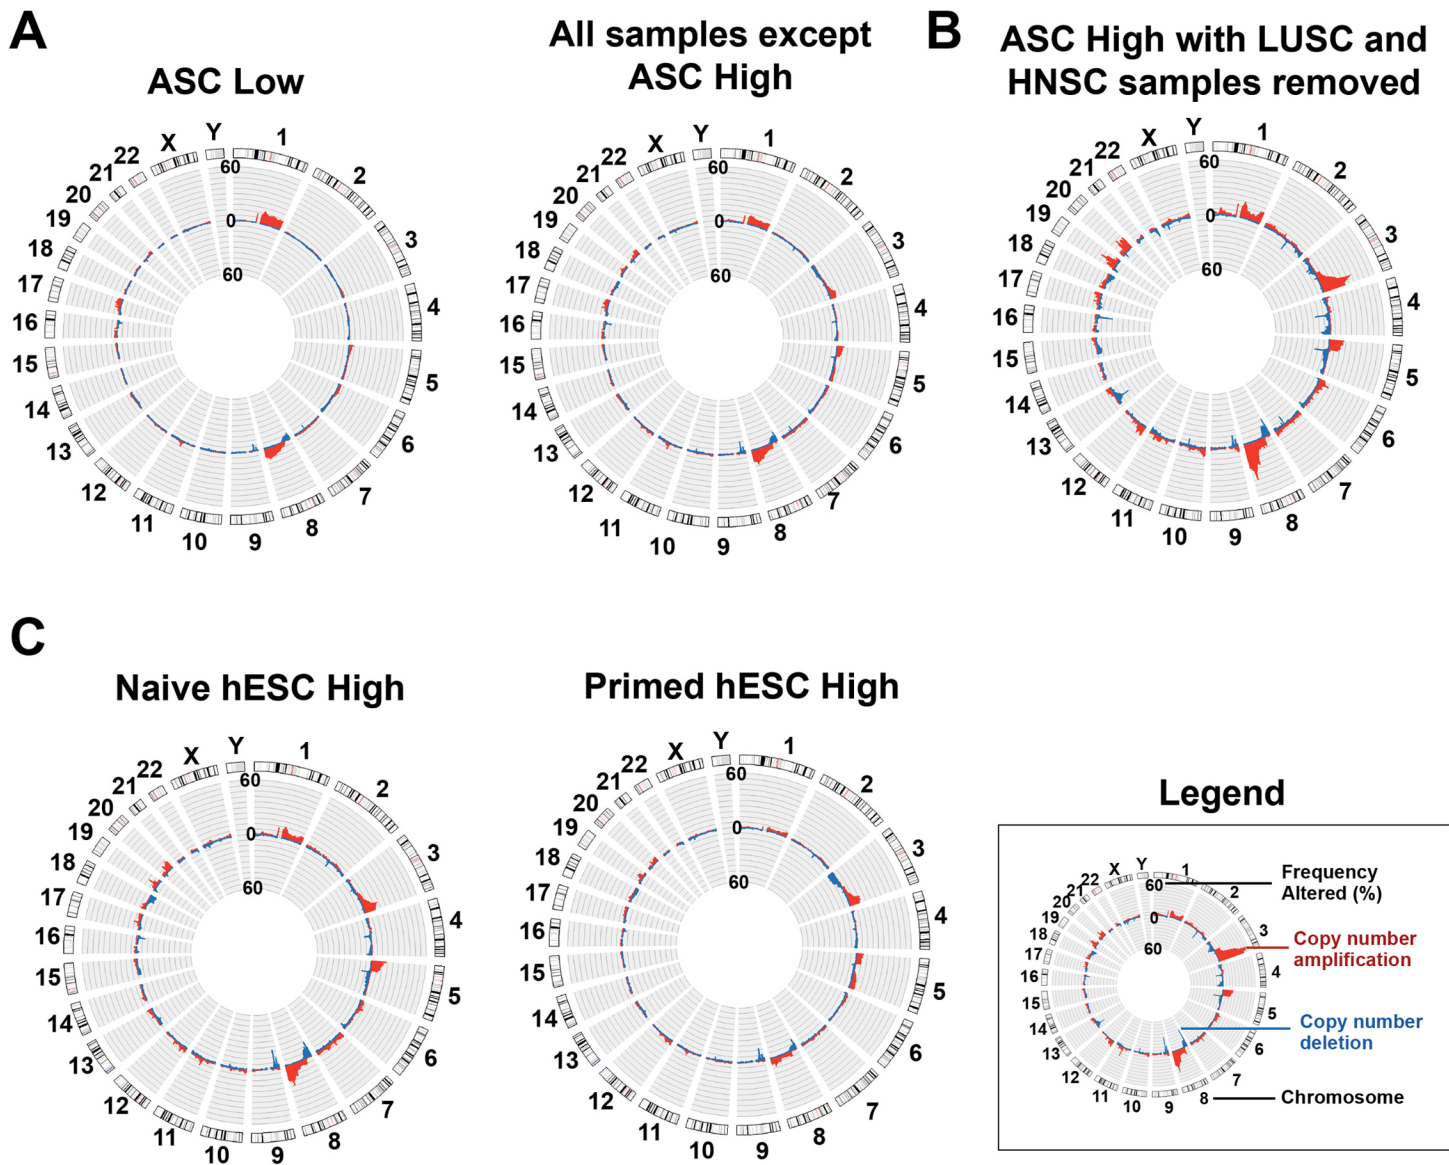

**Figure S3. Cancer related genomic alterations associated with stem cell signature status, Related to Figure 3.** (A) Circos plot of copy number variations associated with adult stem cell signature LOW (ASC Low) epithelial cancer specimens or all epithelial cancer samples that are not ASC High. (B) Circos plot of ASC High associated alterations after removal of lung squamous and head and neck squamous carcinoma samples that were designated as ASC High. (C) Circos plot of naive hESC or primed hESC High associated copy number variations.

**A**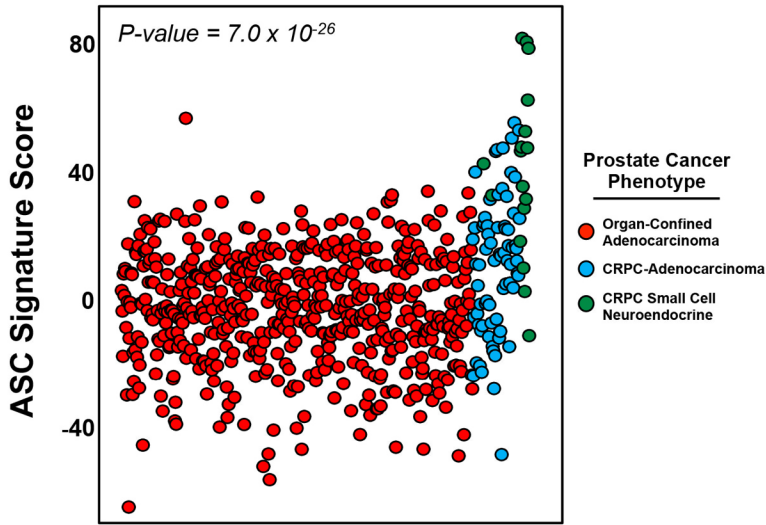**B**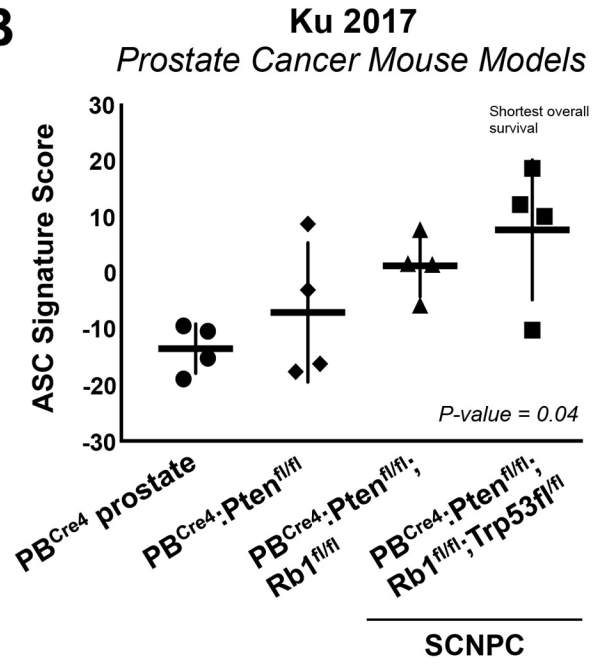**C**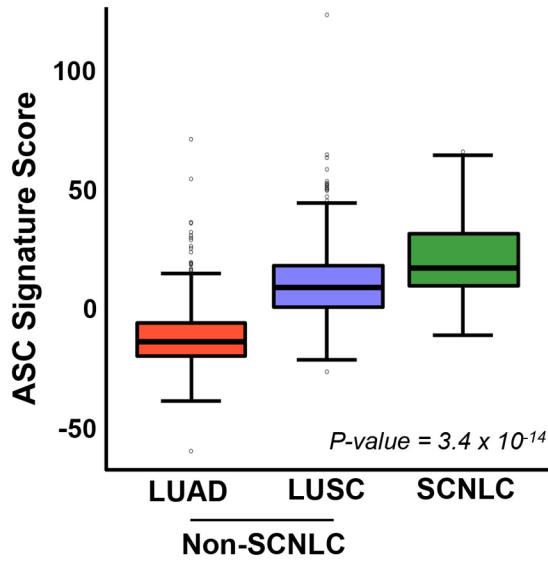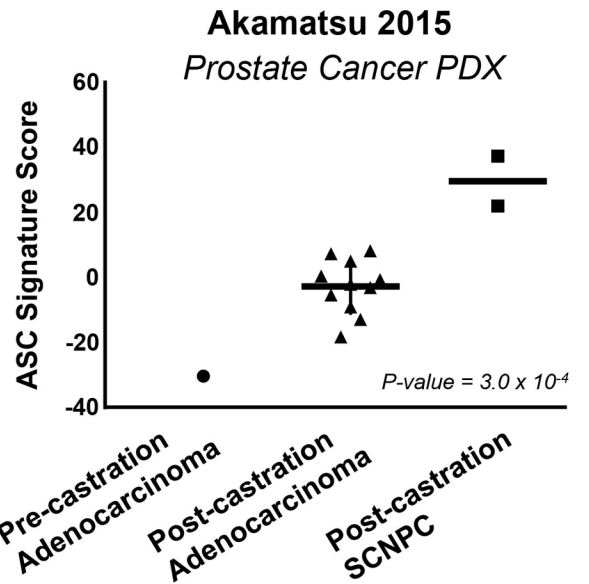**D**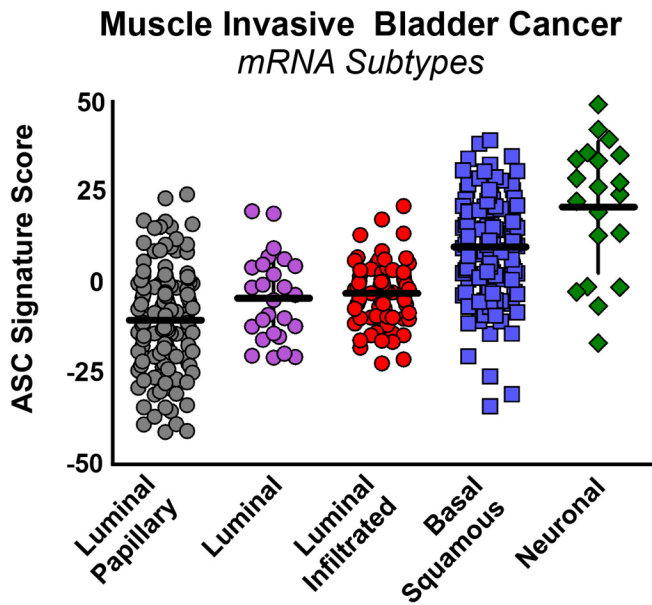**E**

**Muscle Invasive Bladder Cancer mRNA Subtypes**

| Comparison                      | Q-value              |
|---------------------------------|----------------------|
| Neuronal vs. Basal Squamous     | $1.6 \times 10^{-2}$ |
| Neuronal vs Luminal Infiltrated | $1.6 \times 10^{-7}$ |
| Neuronal vs Luminal             | $1.5 \times 10^{-5}$ |
| Neuronal vs Luminal Papillary   | $8.6 \times 10^{-7}$ |



**Figure S4. Adult stem cell signature scores in small cell neuroendocrine cancers, Related to Figure 4.** (A) Adult stem cell signature scores in organ-confined prostate adenocarcinoma (red circles), castration-resistant metastatic prostate adenocarcinoma (blue circles), and castration-resistant metastatic small cell neuroendocrine prostate cancer (green circles) specimens. Samples are from Beltran et al., 2016; Robinson et al., 2015; and The Cancer Genome Atlas Research Network, 2015. P-value was calculated using ANOVA. (B) Adult stem cell signature scores in prostate cancer mouse models (top; Ku et al., 2017) and a prostate cancer patient derived xenograft that converts from an adenocarcinoma to a SCN phenotype following castration (bottom; Akamatsu et al., 2015). (C) Adult stem cell signature scores in small cell neuroendocrine lung cancer (n = 56) and non-small cell neuroendocrine lung adenocarcinoma (LUAD, n = 573) and lung squamous cell carcinoma (LUSC, n = 548) clinical samples. Mean +/- SD. P-value was calculated using student's t-test between SCNLC and Non-SCNLC samples. (D) Adult stem cell signature scores for muscle invasive bladder cancer mRNA subtypes described in Robertson et al., 2017. Mean +/- SD. (E) Q-values for muscle invasive bladder cancer mRNA subtype comparisons to the neuronal mRNA subtype.

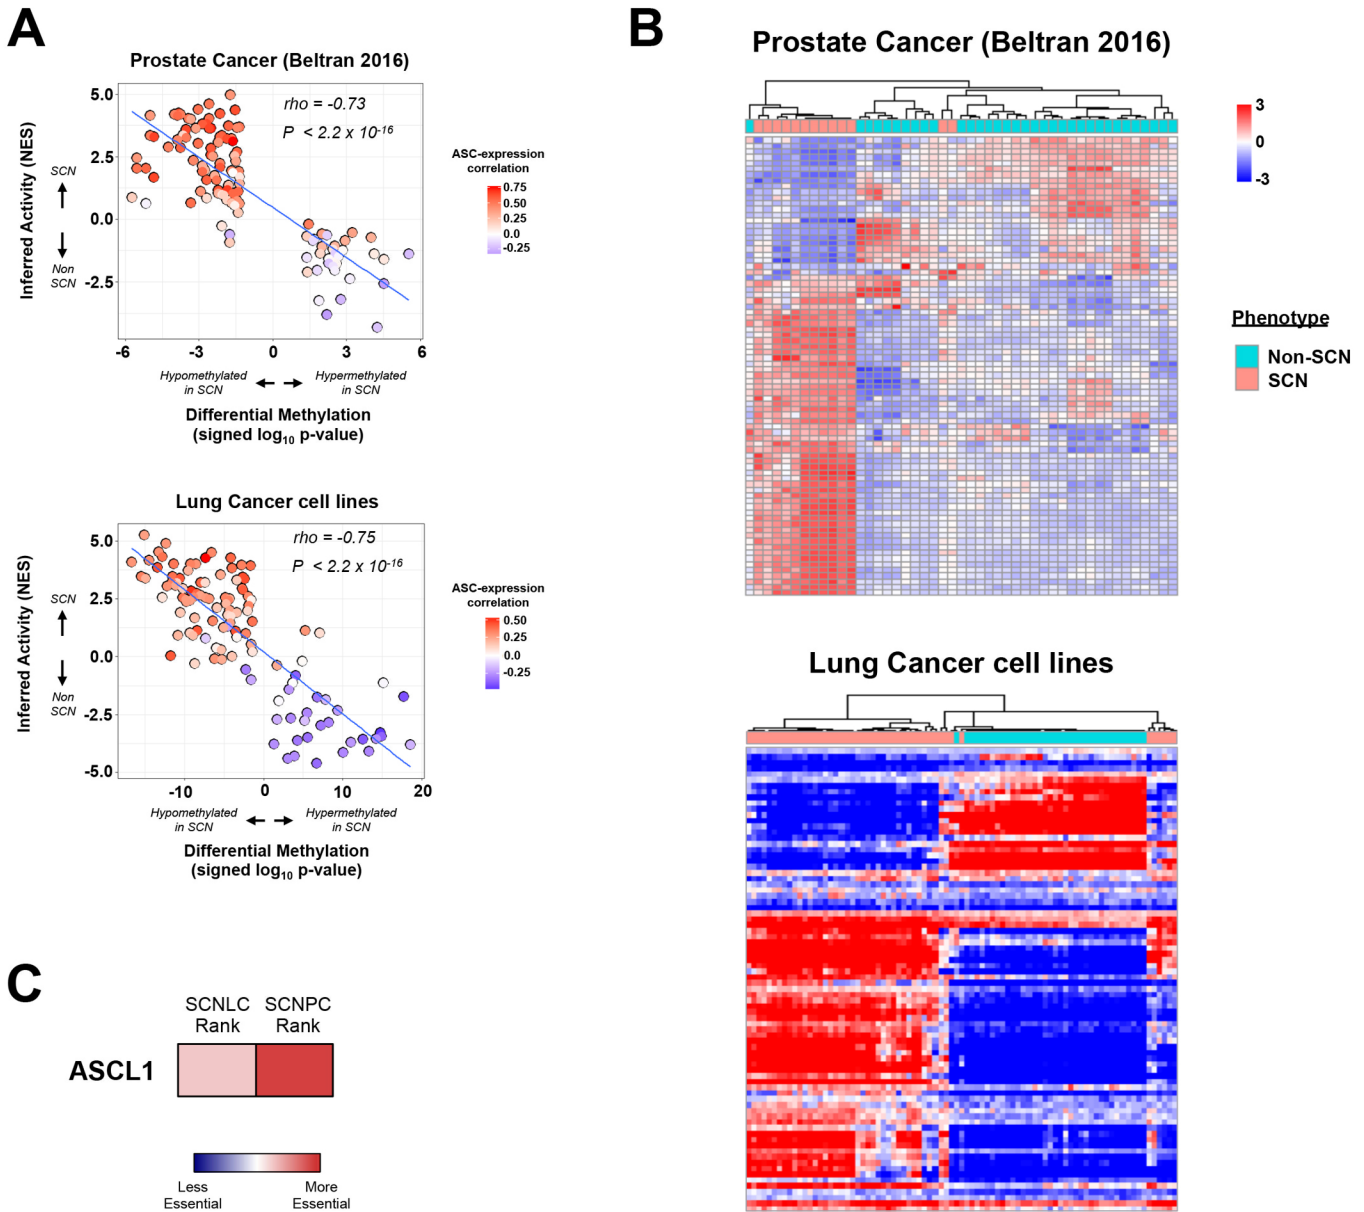

**Figure S5. Common methylation events in small cell neuroendocrine prostate and lung cancers, Related to Figure 7.** (A) Correlation plots of gene activation and signed log p-values for common negatively correlated and differentially methylated genes in the human prostate cancer (top) and lung cancer cell line (bottom) datasets. Inferred protein activation was calculated using VIPER. Inset heatmap represents the rho correlation value of each gene's expression with the adult stem cell signature score. (B) Unsupervised clustering of human prostate cancer (top) and lung cancer cell lines (bottom) using the activation scores of the common negatively correlated and differentially methylated genes. Scale Bar represents the z-score. (C) ASCL1 gene essentiality in lung and prostate small cell neuroendocrine cancers. Heatmap reflects ASCL1's essentiality ranking relative to approximately 17,000 total genes (scale bar).

Table S1. Gene signatures for normal human adult stem cells, naive embryonic stem cells and primed embryonic stem cells, Related to Figure1.

| Adult Stem Cell signature | Naive hESC signature | Primed hESC signature |
|---------------------------|----------------------|-----------------------|
| VSNL1                     | DNMT3L               | SALL2                 |
| AKR1B1                    | ALPPL2               | DUSP6                 |
| NOTCH4                    | NLRP7                | LRRN1                 |
| TMEM237                   | SLC25A16             | P3H2                  |
| SAMD5                     | DPPA5                | CDH2                  |
| PKD2                      | ATAD3B               | VRTN                  |
| NAP1L1                    | OLAH                 | UCHL1                 |
| PTTG1                     | SAMHD1               | STC1                  |
| CDK6                      | PYGB                 | FGFBP3                |
| CDCA7                     | TFCP2L1              | NELL2                 |
| ACSL4                     | LCP1                 | ANOS1                 |
| HELLS                     | NEFH                 | FZD7                  |
| IKBIP                     | RAB15                | THY1                  |
| PLTP                      | SUSD2                | PHLDA1                |
| TMEM201                   | VSIG10               | USP44                 |
| CACHD1                    | PRSS12               | NAP1L3                |
| ILF3                      | PTPRU                | SPRY4                 |
| DNMT1                     | ASRGL1               | PTPRZ1                |
| USP31                     | A4GALT               | EDNRB                 |
| FAM216A                   | DNAJC15              | ADAMTS19              |
| SLC41A1                   | CBFA2T2              | FREM2                 |
| PFKM                      | KHDC1L               | PCYT1B                |
| KANK1                     | SLC8B1               | TAGLN                 |
| SUPT16H                   | SLC35F6              | CAV1                  |
| ADCY3                     | AARS2                | COL7A1                |
| FGD1                      | CDHR1                | CYP26A1               |
| PTPN14                    | SLC25A44             | MAP7                  |
| C20orf27                  | SLC7A7               | PODXL                 |
| LGR6                      | REEP1                | GRPR                  |
| SLC16A7                   | PINK1                | NTS                   |
| JAM3                      | GAS7                 | PLCH1                 |
| FBL                       | KLHL18               | COL18A1               |
| NASP                      | HYAL4                | PCDH18                |
| RANBP1                    | DCAF4                | CRABP1                |
| PRNP                      | TGFBR3               | EPHA2                 |
| DSE                       | SLC23A2              | VIM                   |
| GPX7                      | TUBB4A               | NECTIN3               |
| KDELC1                    | VAV2                 | GLI2                  |
| FCHSD2                    | SLC16A10             | FAM13A                |
| SLCO3A1                   | IL6R                 | DPYSL2                |
| CCNB1IP1                  | ARPC1B               | ATP8A1                |
| LOC284023                 | MYBL2                | PMEL                  |
| NOL9                      | TNS3                 | ZIC2                  |
| NKRF                      | CACNA2D2             | GPC6                  |
| NUP107                    | ITGAM                | FKBP10                |
| RCC2                      | GALNT6               | SEMA3A                |
| ARHGAP25                  | NDUFAB1              | SALL1                 |
| DDX46                     | KLF5                 | ROR1                  |
| TCOF1                     | UPP1                 | HEPH                  |
| GMPS                      | DACT2                | MEX3A                 |

Table S4. Mutations associated with human stem cell signatures (q-value < 0.05), Related to Figure 3.

| Gene                   | Q-value               | Frequency Altered |
|------------------------|-----------------------|-------------------|
| <i>Adult Stem Cell</i> |                       |                   |
| TP53                   | $3.0 \times 10^{-52}$ | 69.5 %            |
| FBXW7                  | $3.0 \times 10^{-4}$  | 10.4 %            |
| NOTCH1                 | $2.1 \times 10^{-3}$  | 7.9 %             |
| <i>Naive hESC</i>      |                       |                   |
| TP53                   | $3.0 \times 10^{-7}$  | 54.2 %            |
| OR4A5                  | $4.8 \times 10^{-3}$  | 4.2 %             |
| NOTCH1                 | $7.1 \times 10^{-3}$  | 7.9 %             |
| PRDM9                  | $7.1 \times 10^{-3}$  | 7.7 %             |
| <i>Primed hESC</i>     |                       |                   |
| VHL                    | $4.8 \times 10^{-17}$ | 13.1 %            |



Table S6. Epithelial cancers included in the pan-epithelial cancer dataset, Related to STAR methods.

| Cancer type                                                      | TCGA abbreviation | Number of Samples |
|------------------------------------------------------------------|-------------------|-------------------|
| Adrenocortical Carcinoma                                         | ACC               | 77                |
| Bladder Urothelial Carcinoma                                     | BLCA              | 358               |
| Breast Invasive Carcinoma                                        | BRCA              | 921               |
| Cervical Squamous Cell Carcinoma and Endocervical Adenocarcinoma | CESC              | 218               |
| Cholangiocarcinoma                                               | CHOL              | 33                |
| Colorectal Adenocarcinoma                                        | COADREAD          | 260               |
| Head and Neck Squamous Cell Carcinoma                            | HNSC              | 434               |
| Kidney Chromophobe                                               | KICH              | 65                |
| Kidney Renal Clear Cell Carcinoma                                | KIRC              | 494               |
| Kidney Renal Papillary Cell Carcinoma                            | KIRP              | 261               |
| Liver Hepatocellular Carcinoma                                   | LIHC              | 353               |
| Lung Adenocarcinoma                                              | LUAD              | 491               |
| Lung Squamous Cell Carcinoma                                     | LUSC              | 401               |
| Ovarian Serous Cystadenocarcinoma                                | OV                | 296               |
| Pancreatic Adenocarcinoma                                        | PAAD              | 174               |
| Stomach Adenocarcinoma                                           | STAD              | 372               |
| Thyroid Carcinoma                                                | THCA              | 502               |
| Uterine Corpus Endometrial Carcinoma                             | UCEC              | 369               |
| Uterine Carcinosarcoma                                           | UCS               | 57                |

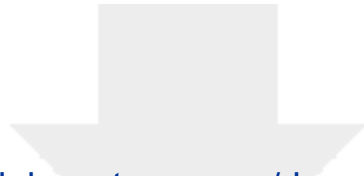

[Click here to access/download](#)

**Supplemental Videos and Spreadsheets**

Table S2\_ASC Copy Number Amplifications.xlsx

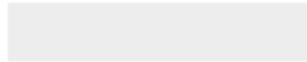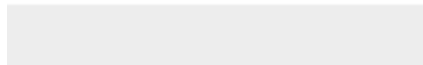

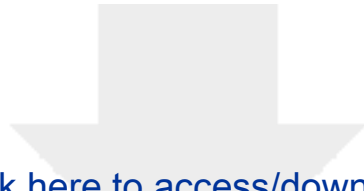

[Click here to access/download](#)

**Supplemental Videos and Spreadsheets**  
**Table S3\_ASC Copy Number Deletions.xlsx**

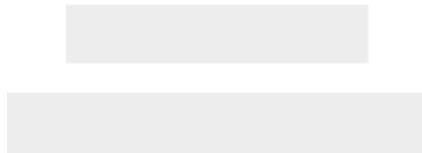

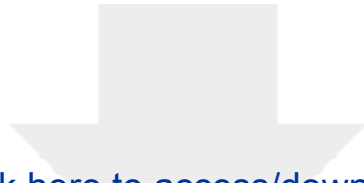

[Click here to access/download](#)

**Supplemental Videos and Spreadsheets**  
**Table S5\_Common methylated genes.xlsx**



Supplement: NIHMS1002246-supplement-4.pdf [file NIHMS1002246-supplement-4.pdf]
