# Supplementary material
Source: PubMed Central journal article supplement (PMC6382070)
Supplement: NIHMS1002246-supplement-TableS2.pdf [file NIHMS1002246-supplement-TableS2.pdf]

| <b>Gene</b> | <b>Chromosomal location</b> | <b>Q-value</b> | <b>Alteration Frequency</b> |
|-------------|-----------------------------|----------------|-----------------------------|
| MEGF10      | 05q33                       | 1.83E-04       | 4.4%                        |
| LRRTM2      | 05q31                       | 1.83E-04       | 4.8%                        |
| CXXC5       | 05q31.3                     | 1.83E-04       | 4.8%                        |
| SLC25A2     | 05q31.3                     | 1.83E-04       | 4.6%                        |
| TAF7        | 05q31                       | 1.83E-04       | 4.6%                        |
| DIAPH1      | 05q31                       | 1.83E-04       | 4.6%                        |
| HDAC3       | 05q31.1-q31.2               | 1.83E-04       | 4.6%                        |
| RELL2       | 05q31.3                     | 1.83E-04       | 4.6%                        |
| FCHSD1      | 05q31.3                     | 1.83E-04       | 4.6%                        |
| ARAP3       | 05q31.3                     | 1.83E-04       | 4.6%                        |
| PCDH1       | 05q31.3                     | 1.83E-04       | 4.7%                        |
| KIAA0141    | 05q31                       | 1.83E-04       | 4.6%                        |
| PCDH12      | 05q31.3                     | 1.83E-04       | 4.6%                        |
| RNF14       | 05q23.3-q31.1               | 1.83E-04       | 4.6%                        |
| GNPDA1      | 05q21                       | 1.83E-04       | 4.6%                        |
| NDFIP1      | 05q31.3                     | 1.83E-04       | 4.6%                        |
| SPRY4       | 05q31.3                     | 1.83E-04       | 4.6%                        |
| FGF1        | 05q31.3-q33.2               | 1.83E-04       | 4.8%                        |
| ARHGAP26    | 05q31                       | 1.83E-04       | 4.8%                        |
| HMHB1       | 05q31.3                     | 1.83E-04       | 4.5%                        |
| YIPF5       | 05q31.3                     | 1.83E-04       | 4.5%                        |
| PLAC8L1     | 05q32                       | 1.83E-04       | 4.5%                        |
| LARS        | 05q32                       | 1.83E-04       | 4.5%                        |
| RBM27       | 05q32                       | 1.83E-04       | 4.5%                        |
| POU4F3      | 05q32                       | 1.83E-04       | 4.5%                        |
| TCERG1      | 05q31                       | 1.83E-04       | 4.5%                        |
| GPR151      | 05q32                       | 1.83E-04       | 4.5%                        |
| HMGXB3      | 05q33.1                     | 1.83E-04       | 4.5%                        |
| CSF1R       | 05q32                       | 1.83E-04       | 4.5%                        |
| PDGFRB      | 05q33.1                     | 1.83E-04       | 4.5%                        |
| CDX1        | 05q32                       | 1.83E-04       | 4.5%                        |
| SLC6A7      | 05q32                       | 1.83E-04       | 4.5%                        |
| CAMK2A      | 05q32                       | 1.83E-04       | 4.5%                        |
| MYOZ3       | 05q33.2                     | 1.83E-04       | 4.5%                        |
| RBM22       | 05q33.1                     | 1.83E-04       | 4.5%                        |

|          |               |          |      |
|----------|---------------|----------|------|
| DCTN4    | 05q33.1       | 1.83E-04 | 4.5% |
| SMIM3    | 05q33.1       | 1.83E-04 | 4.5% |
| IRGM     | 05q33.1       | 1.83E-04 | 4.5% |
| ZNF300   | 05q33.1       | 1.83E-04 | 4.5% |
| NMUR2    | 05q33.1       | 1.83E-04 | 4.5% |
| FAM114A2 | 05q33.2       | 1.83E-04 | 4.5% |
| GALNT10  | 05q34         | 1.83E-04 | 4.6% |
| SAP30L   | 05q33.2       | 1.83E-04 | 4.6% |
| HAND1    | 05q33         | 1.83E-04 | 4.6% |
| KIF4B    | 05q33.2       | 1.83E-04 | 4.5% |
| HAVCR1   | 05q33.2       | 1.83E-04 | 4.6% |
| HAVCR2   | 05q34         | 1.83E-04 | 4.6% |
| MED7     | 05q33.3       | 1.83E-04 | 4.6% |
| ITK      | 05q31-q32     | 1.83E-04 | 4.6% |
| FAM71B   | 05q33.3       | 1.83E-04 | 4.6% |
| CYFIP2   | 05q34         | 1.83E-04 | 4.6% |
| FNDC9    | 05q33.3       | 1.83E-04 | 4.6% |
| ADAM19   | 05q33.3       | 1.83E-04 | 4.8% |
| NIPAL4   | 05q33.3       | 1.83E-04 | 4.6% |
| C5orf52  | 05q33.3       | 1.83E-04 | 4.6% |
| THG1L    | 05q33.3       | 1.83E-04 | 4.6% |
| LSM11    | 05q33.3       | 1.83E-04 | 4.6% |
| UBLCP1   | 05q33.3       | 1.83E-04 | 4.7% |
| IL12B    | 05q31.1-q33.1 | 1.83E-04 | 4.7% |
| ADRA1B   | 05q33.3       | 1.83E-04 | 4.8% |
| TTC1     | 05q32-q33.2   | 1.83E-04 | 4.8% |
| PWWP2A   | 05q33.3       | 1.83E-04 | 4.8% |
| FABP6    | 05q23-q35     | 1.83E-04 | 4.8% |
| CCNJL    | 05q33.3       | 1.83E-04 | 4.8% |
| C1QTNF2  | 05q33.3       | 1.83E-04 | 4.8% |
| SLU7     | 05q33.3       | 1.83E-04 | 4.8% |
| PTTG1    | 05q35.1       | 1.83E-04 | 4.8% |
| ATP10B   | 05q34         | 1.83E-04 | 5.0% |
| GABRB2   | 05q34         | 1.83E-04 | 5.0% |
| GABRA6   | 05q34         | 1.83E-04 | 5.0% |
| GABRA1   | 05q34         | 1.83E-04 | 5.0% |

|         |             |          |      |
|---------|-------------|----------|------|
| GABRG2  | 05q34       | 1.83E-04 | 5.0% |
| HMMR    | 05q34       | 1.83E-04 | 5.1% |
| MAT2B   | 05q34       | 1.83E-04 | 5.1% |
| TENM2   | 05q35       | 1.83E-04 | 5.2% |
| WWC1    | 05q34       | 1.83E-04 | 5.3% |
| RARS    | 05q35.1     | 1.83E-04 | 5.2% |
| PANK3   | 05q35.1     | 1.83E-04 | 5.2% |
| SPDL1   | 05q35.1     | 1.83E-04 | 5.1% |
| SOX30   | 05q33       | 1.84E-04 | 4.4% |
| GABRP   | 05q35.1     | 1.88E-04 | 5.4% |
| RANBP17 | 05q34       | 2.12E-04 | 5.6% |
| CTNNA1  | 05q31.2     | 2.24E-04 | 4.7% |
| EBF1    | 05q34       | 2.24E-04 | 4.7% |
| RNF145  | 05q33.3     | 2.24E-04 | 4.7% |
| CCNG1   | 05q32-q34   | 2.50E-04 | 5.0% |
| NUDCD2  | 05q34       | 2.53E-04 | 5.0% |
| LCP2    | 05q35.1     | 2.69E-04 | 5.2% |
| SLC26A2 | 05q31-q34   | 2.69E-04 | 4.3% |
| TIGD6   | 05q33.1     | 2.69E-04 | 4.3% |
| GPX3    | 05q33.1     | 2.69E-04 | 4.3% |
| TNIP1   | 05q32-q33.1 | 2.69E-04 | 4.3% |
| ANXA6   | 05q33.1     | 2.69E-04 | 4.3% |
| CCDC69  | 05q33.1     | 2.69E-04 | 4.3% |
| GM2A    | 05q33.1     | 2.69E-04 | 4.3% |
| KCNIP1  | 05q35       | 2.69E-04 | 5.2% |
| KCNMB1  | 05q34       | 2.69E-04 | 5.2% |
| TLX3    | 05q35.1     | 2.97E-04 | 5.5% |
| NPM1    | 05q35.1     | 2.98E-04 | 5.5% |
| FGF18   | 05q34       | 2.98E-04 | 5.5% |
| STK32A  | 05q32       | 3.08E-04 | 4.6% |
| PRELID2 | 05q32       | 3.13E-04 | 4.6% |
| SCGB3A2 | 05q32       | 3.13E-04 | 4.6% |
| C5orf46 | 05q33.1     | 3.13E-04 | 4.6% |
| SPINK14 | 05q32       | 3.13E-04 | 4.6% |
| GRIA1   | 05q33       | 3.13E-04 | 4.6% |
| MFAP3   | 05q32-q33.2 | 3.13E-04 | 4.6% |

|          |           |          |      |
|----------|-----------|----------|------|
| CLINT1   | 05q33.3   | 3.13E-04 | 4.6% |
| SPINK13  | 05q32     | 3.17E-04 | 4.6% |
| H2AFY    | 05q31.1   | 3.28E-04 | 4.2% |
| TIFAB    | 05q31.1   | 3.28E-04 | 4.2% |
| NEUROG1  | 05q23-q31 | 3.28E-04 | 4.2% |
| CXCL14   | 05q31     | 3.28E-04 | 4.2% |
| SLC25A48 | 05q31.1   | 3.28E-04 | 4.2% |
| IL9      | 05q31-q35 | 3.28E-04 | 4.2% |
| LECT2    | 05q31.1   | 3.28E-04 | 4.2% |
| FBXL21   | 05q31     | 3.28E-04 | 4.2% |
| PPP2R2B  | 05q32     | 3.28E-04 | 4.8% |
| SGCD     | 05q33-q34 | 3.28E-04 | 4.6% |
| TIMD4    | 05q33.3   | 3.28E-04 | 4.6% |
| DOCK2    | 05q35.1   | 3.28E-04 | 5.1% |
| FAM196B  | 05q35.1   | 3.28E-04 | 5.1% |
| FOXI1    | 05q34     | 3.28E-04 | 5.1% |
| SLIT3    | 05q35     | 3.40E-04 | 5.1% |
| LMNB1    | 05q23.2   | 3.41E-04 | 4.2% |
| KCTD16   | 05q32     | 4.39E-04 | 4.5% |
| GRXCR2   | 05q32     | 4.45E-04 | 4.5% |
| SH3RF2   | 05q32     | 4.45E-04 | 4.5% |
| SPINK6   | 05q32     | 4.45E-04 | 4.5% |
| SPINK9   | 05q32     | 4.45E-04 | 4.5% |
| ARSI     | 05q32     | 4.45E-04 | 4.5% |
| GLRA1    | 05q33.1   | 4.45E-04 | 4.5% |
| SPINK7   | 05q32     | 4.47E-04 | 4.5% |
| SYNPO    | 05q33.1   | 4.47E-04 | 4.5% |
| TCOF1    | 05q32     | 4.52E-04 | 4.5% |
| LARP1    | 05q33.2   | 4.52E-04 | 4.5% |
| CNOT8    | 05q31-q33 | 4.52E-04 | 4.5% |
| MRPL22   | 05q33.2   | 4.52E-04 | 4.5% |
| FAXDC2   | 05q31-q32 | 4.57E-04 | 4.5% |
| MATR3    | 05q31.3   | 5.09E-04 | 4.7% |
| PAIP2    | 05q32     | 5.09E-04 | 4.7% |
| SLC23A1  | 05q31.2   | 5.09E-04 | 4.7% |
| MZB1     | 05q31.2   | 5.09E-04 | 4.7% |

|          |               |          |      |
|----------|---------------|----------|------|
| PROB1    | 05q31.2       | 5.09E-04 | 4.7% |
| SPATA24  | 05q31.2       | 5.09E-04 | 4.7% |
| SH3PXD2B | 05q35.2       | 5.09E-04 | 5.3% |
| BNIP1    | 05q33-q34     | 5.09E-04 | 5.3% |
| ALDH7A1  | 05q31         | 5.11E-04 | 4.1% |
| PHAX     | 05q23.2       | 5.11E-04 | 4.1% |
| C5orf63  | 05q23.2       | 5.11E-04 | 4.1% |
| SIL1     | 05q31         | 5.11E-04 | 4.7% |
| ANKHD1   | 05q31.3       | 5.11E-04 | 5.0% |
| UBTD2    | 05q35.1       | 5.11E-04 | 5.2% |
| KDM3B    | 05q31         | 5.34E-04 | 5.0% |
| REEP2    | 05q31         | 5.34E-04 | 5.0% |
| KIF20A   | 05q31         | 5.36E-04 | 4.9% |
| CDC23    | 05q31         | 5.36E-04 | 4.9% |
| GFRA3    | 05q31.1-q31.3 | 5.36E-04 | 4.9% |
| CDC25C   | 05q31         | 5.36E-04 | 4.9% |
| EGR1     | 05q23-q31     | 5.36E-04 | 5.0% |
| ETF1     | 05q31.2       | 5.36E-04 | 5.0% |
| FBN2     | 05q23-q31     | 5.89E-04 | 4.3% |
| ISOC1    | 05q22.1-q33.3 | 5.89E-04 | 4.3% |
| SLC27A6  | 05q23.3       | 5.95E-04 | 4.3% |
| SLC36A1  | 05q33.1       | 5.95E-04 | 4.3% |
| SPARC    | 05q31-q33     | 5.95E-04 | 4.3% |
| ATOX1    | 05q32         | 5.95E-04 | 4.3% |
| G3BP1    | 05q33.1       | 5.95E-04 | 4.3% |
| SLC36A2  | 05q33.1       | 6.03E-04 | 4.3% |
| SLC36A3  | 05q33.1       | 6.11E-04 | 4.3% |
| PDE6A    | 05q31.2-q34   | 6.20E-04 | 4.4% |
| ZMAT2    | 05q31         | 6.72E-04 | 4.6% |
| HARS2    | 05q31.3       | 6.81E-04 | 4.6% |
| DPYSL3   | 05q32         | 6.90E-04 | 4.6% |
| SPINK1   | 05q32         | 6.90E-04 | 4.6% |
| KIAA1191 | 05q35.2       | 6.90E-04 | 5.4% |
| ARL10    | 05q35.3       | 6.90E-04 | 5.4% |
| NOP16    | 05q35.2       | 6.90E-04 | 5.4% |
| HIGD2A   | 05q35.2       | 6.90E-04 | 5.4% |

|           |           |          |      |
|-----------|-----------|----------|------|
| CLTB      | 05q35.2   | 6.90E-04 | 5.4% |
| SPINK5    | 05q32     | 7.01E-04 | 4.6% |
| DRD1      | 05q34-q35 | 7.01E-04 | 5.1% |
| CPLX2     | 05q35.2   | 7.10E-04 | 5.4% |
| HRH2      | 05q35     | 7.22E-04 | 5.4% |
| SLC4A9    | 05q31.3   | 7.37E-04 | 4.8% |
| FBXW11    | 05q35.1   | 7.55E-04 | 5.1% |
| EFCAB9    | 05q35.1   | 7.55E-04 | 5.1% |
| STK10     | 05q35.1   | 7.55E-04 | 5.1% |
| FAM53C    | 05q31     | 7.64E-04 | 4.8% |
| PSD2      | 05q31.3   | 7.64E-04 | 4.8% |
| BRD8      | 05q31     | 7.75E-04 | 4.8% |
| HSPA9     | 05q31.1   | 7.88E-04 | 4.8% |
| ADAMTS19  | 05q23.3   | 8.10E-04 | 4.2% |
| KIAA1024L | 05q23.3   | 8.10E-04 | 4.2% |
| CHSY3     | 05q13     | 8.10E-04 | 4.2% |
| C5orf24   | 05q31.1   | 8.10E-04 | 4.2% |
| TXNDC15   | 05q31.1   | 8.10E-04 | 4.2% |
| SMAD5     | 05q31     | 8.10E-04 | 4.2% |
| SLC12A2   | 05q23.3   | 8.12E-04 | 4.2% |
| TCF7      | 05q31     | 8.12E-04 | 4.2% |
| SKP1      | 05q31     | 8.12E-04 | 4.2% |
| PPP2CA    | 05q31.1   | 8.12E-04 | 4.2% |
| PCBD2     | 05q31.1   | 8.12E-04 | 4.2% |
| TGFBI     | 05q31     | 8.12E-04 | 4.2% |
| TRPC7     | 05q31.2   | 8.12E-04 | 4.2% |
| CTXN3     | 05q23.2   | 8.38E-04 | 4.2% |
| PRRC1     | 05q23.2   | 8.49E-04 | 4.2% |
| CLK4      | 05q35     | 9.63E-04 | 5.3% |
| NR3C1     | 05q31-q32 | 9.99E-04 | 4.5% |
| ATP6V0E1  | 05q35.2   | 1.02E-03 | 5.3% |
| FBXO38    | 05q33.1   | 1.03E-03 | 4.5% |
| GEMIN5    | 05q34     | 1.04E-03 | 4.5% |
| CREBRF    | 05q35.2   | 1.04E-03 | 5.3% |
| STC2      | 05q35.2   | 1.04E-03 | 5.3% |
| SFXN1     | 05q35.3   | 1.04E-03 | 5.3% |

|          |           |          |      |
|----------|-----------|----------|------|
| CD74     | 05q32     | 1.08E-03 | 4.5% |
| UBE2D2   | 05q31.2   | 1.10E-03 | 4.7% |
| DNAJC18  | 05q31.2   | 1.14E-03 | 4.7% |
| ECSCR    | 05q31.2   | 1.15E-03 | 4.7% |
| TMEM173  | 05q31.2   | 1.15E-03 | 4.7% |
| ACSL6    | 05q31     | 1.46E-03 | 4.3% |
| FNIP1    | 05q23.3   | 1.48E-03 | 4.3% |
| CDHR2    | 05q35.2   | 1.49E-03 | 5.4% |
| GPRIN1   | 05q35.2   | 1.49E-03 | 5.4% |
| FAF2     | 05q35.2   | 1.51E-03 | 5.4% |
| RNF44    | 05q35.3   | 1.51E-03 | 5.4% |
| SIMC1    | 05q35.2   | 1.53E-03 | 5.4% |
| MSX2     | 05q35.2   | 1.54E-03 | 5.1% |
| FAT2     | 05q33.1   | 1.57E-03 | 4.3% |
| ABLIM3   | 05q33.1   | 1.62E-03 | 4.4% |
| BOD1     | 05q35.2   | 1.62E-03 | 5.1% |
| HARS     | 05q31.3   | 1.64E-03 | 4.6% |
| JAKMIP2  | 05q32     | 1.64E-03 | 4.6% |
| ZNF608   | 05q23.2   | 1.66E-03 | 3.7% |
| PKD2L2   | 05q31     | 1.66E-03 | 4.6% |
| SRA1     | 05q31     | 1.66E-03 | 4.6% |
| EIF4EBP3 | 05q31.3   | 1.66E-03 | 4.6% |
| APBB3    | 05q31     | 1.66E-03 | 4.6% |
| SLC35A4  | 05q31.3   | 1.66E-03 | 4.6% |
| DND1     | 05q31.3   | 1.66E-03 | 4.6% |
| NME5     | 05q31.2   | 1.72E-03 | 4.6% |
| SNCAIP   | 05q23.2   | 1.72E-03 | 3.7% |
| ZNF474   | 05q23.2   | 1.77E-03 | 3.7% |
| HK3      | 05q35.2   | 2.07E-03 | 5.5% |
| RAPGEF6  | 05q31.1   | 2.08E-03 | 4.2% |
| IL3      | 05q23-q31 | 2.08E-03 | 4.2% |
| CSF2     | 05q23-q31 | 2.08E-03 | 4.2% |
| ZCCHC10  | 05q31.1   | 2.08E-03 | 4.2% |
| HSPA4    | 05q31.1   | 2.08E-03 | 4.2% |
| C5orf15  | 05q31.1   | 2.08E-03 | 4.2% |
| VDAC1    | 05q31     | 2.08E-03 | 4.2% |

|          |           |          |      |
|----------|-----------|----------|------|
| CDKL3    | 05q31.1   | 2.08E-03 | 4.2% |
| UBE2B    | 05q31.1   | 2.08E-03 | 4.2% |
| SEC24A   | 05q31.1   | 2.08E-03 | 4.2% |
| CAMLG    | 05q23     | 2.08E-03 | 4.2% |
| DDX46    | 05q31.1   | 2.08E-03 | 4.2% |
| CATSPER3 | 05q31.2   | 2.08E-03 | 4.2% |
| PITX1    | 05q31.1   | 2.08E-03 | 4.2% |
| C5orf47  | 05q35.2   | 2.08E-03 | 5.2% |
| FAM153B  | 05q35.2   | 2.08E-03 | 5.3% |
| ZNF354A  | 05q35.3   | 2.08E-03 | 5.3% |
| ZNF354B  | 05q35.3   | 2.08E-03 | 5.3% |
| ZFP2     | 05q35.3   | 2.08E-03 | 5.3% |
| ZNF454   | 05q35.3   | 2.08E-03 | 5.3% |
| GRM6     | 05q35     | 2.08E-03 | 5.3% |
| ZNF879   | 05q35.3   | 2.08E-03 | 5.3% |
| ZNF354C  | 05q35     | 2.08E-03 | 5.3% |
| CNOT6    | 05q35.3   | 2.08E-03 | 5.3% |
| SCGB3A1  | 05q35.3   | 2.08E-03 | 5.3% |
| FLT4     | 05q34-q35 | 2.08E-03 | 5.3% |
| MGAT1    | 05q35.3   | 2.08E-03 | 5.3% |
| OR2Y1    | 05q35     | 2.08E-03 | 5.3% |
| ZFP62    | 05q35.3   | 2.08E-03 | 5.3% |
| BTNL8    | 05q35.3   | 2.08E-03 | 5.3% |
| BTNL3    | 05q35     | 2.08E-03 | 5.0% |
| BTNL9    | 05q35.3   | 2.08E-03 | 5.0% |
| GNB2L1   | 05q35.3   | 2.08E-03 | 5.0% |
| OR2V1    | 05q35.3   | 2.08E-03 | 5.0% |
| OR2V2    | 05q35.3   | 2.08E-03 | 5.0% |
| OR4F3    | 05q35.3   | 2.08E-03 | 5.0% |
| TRIM41   | 05q35.3   | 2.08E-03 | 5.0% |
| TRIM52   | 05q35.3   | 2.08E-03 | 5.0% |
| TRIM7    | 05q35.3   | 2.08E-03 | 5.0% |
| SAR1B    | 05q31.1   | 2.15E-03 | 4.2% |
| NEURL1B  | 05q35.1   | 2.19E-03 | 5.3% |
| RPL26L1  | 05q35.2   | 2.19E-03 | 5.3% |
| ADRB2    | 05q31-q32 | 2.21E-03 | 4.2% |



|          |               |          |      |
|----------|---------------|----------|------|
| MYOT     | 05q31.2       | 2.30E-03 | 4.5% |
| ARHGEF37 | 05q33.1       | 2.30E-03 | 4.5% |
| CSNK1A1  | 05q32         | 2.33E-03 | 4.5% |
| HTR4     | 05q31-q33     | 2.41E-03 | 4.5% |
| PURA     | 05q31         | 2.47E-03 | 4.7% |
| FTMT     | 05q23.1       | 2.60E-03 | 3.6% |
| SRFBP1   | 05q23.1       | 2.60E-03 | 3.6% |
| LOX      | 05q23.3-q31.2 | 2.60E-03 | 3.6% |
| SNCB     | 05q35         | 2.75E-03 | 5.4% |
| EIF4E1B  | 05q35.2       | 2.75E-03 | 5.4% |
| TSPAN17  | 05q35.3       | 2.75E-03 | 5.4% |
| UNC5A    | 05q35.3       | 2.75E-03 | 5.4% |
| TMED9    | 05q35.3       | 2.75E-03 | 5.4% |
| B4GALT7  | 05q35.1-q35.3 | 2.75E-03 | 5.4% |
| THOC3    | 05q35.3       | 2.98E-03 | 5.4% |
| PHYKPL   | 05q35.3       | 3.00E-03 | 5.2% |
| FAM153A  | 05q35.3       | 3.02E-03 | 5.2% |
| N4BP3    | 05q35.3       | 3.02E-03 | 5.2% |
| NHP2     | 05q35.3       | 3.02E-03 | 5.2% |
| HNRNPAB  | 05q35.3       | 3.02E-03 | 5.2% |
| PROP1    | 05q35.3       | 3.04E-03 | 5.2% |
| RMND5B   | 05q35.3       | 3.04E-03 | 5.2% |
| MAPK9    | 05q35         | 3.04E-03 | 5.2% |
| GFPT2    | 05q           | 3.04E-03 | 5.2% |
| HINT1    | 05q31.2       | 3.06E-03 | 4.1% |
| CDC42SE2 | 05q31.1       | 3.06E-03 | 4.1% |
| LYRM7    | 05q31.1       | 3.10E-03 | 4.1% |
| GRAMD3   | 05q23.2       | 3.20E-03 | 4.1% |
| FSTL4    | 05q31.1       | 3.30E-03 | 4.3% |
| FBXO27   | 19q13.2       | 3.41E-03 | 5.6% |
| KLHL3    | 05q31         | 3.51E-03 | 4.3% |
| HNRNPA0  | 05q31         | 3.51E-03 | 4.3% |
| PPARGC1B | 05q33.1       | 3.51E-03 | 4.4% |
| FAM13B   | 05q31         | 3.53E-03 | 4.6% |
| CD14     | 05q31.3       | 3.53E-03 | 4.6% |
| NDUFA2   | 05q31.2       | 3.53E-03 | 4.6% |

|            |               |          |      |
|------------|---------------|----------|------|
| TMCO6      | 05q31.3       | 3.53E-03 | 4.6% |
| IK         | 05q31.3       | 3.53E-03 | 4.6% |
| WDR55      | 05q31.3       | 3.53E-03 | 4.6% |
| GRPEL2     | 05q33.1       | 3.53E-03 | 4.4% |
| PCYOX1L    | 05q33.1       | 3.53E-03 | 4.4% |
| AFAP1L1    | 05q33.1       | 3.54E-03 | 4.4% |
| WNT8A      | 05q31         | 3.57E-03 | 4.6% |
| IGIP       | 05q31         | 3.57E-03 | 4.6% |
| IL17B      | 05q33.1       | 3.57E-03 | 4.4% |
| NDST1      | 05q33.1       | 3.83E-03 | 4.3% |
| RPS14      | 05q31-q33     | 3.89E-03 | 4.3% |
| ZNF346     | 05q35.3       | 3.89E-03 | 5.5% |
| RUFY1      | 05q35.3       | 4.10E-03 | 5.3% |
| CBY3       | 05q35.3       | 4.17E-03 | 5.3% |
| CPEB4      | 05q21         | 4.41E-03 | 5.2% |
| RASGEF1C   | 05q35.3       | 4.41E-03 | 5.3% |
| CSNK1G3    | 05q23         | 4.43E-03 | 3.7% |
| SNX2       | 05q23.2       | 4.47E-03 | 3.7% |
| SNX24      | 05q23.2       | 4.47E-03 | 3.7% |
| PAK4       | 19p11-q11     | 4.61E-03 | 5.8% |
| MRPS12     | 19q13.1-q13.2 | 4.86E-03 | 5.5% |
| FBXO17     | 19q13.2       | 4.86E-03 | 5.5% |
| P4HA2      | 05q31         | 4.88E-03 | 4.2% |
| PDLIM4     | 05q31.1       | 4.88E-03 | 4.2% |
| SLC22A4    | 05q23.3       | 4.88E-03 | 4.2% |
| IRF1       | 05q23-q31     | 4.94E-03 | 4.2% |
| IL5        | 05q23-q31     | 4.94E-03 | 4.2% |
| CDKN2AIPNL | 05q31.1       | 5.10E-03 | 4.2% |
| SPOCK1     | 05q31.2       | 5.27E-03 | 4.2% |
| HBEGF      | 05q23         | 5.34E-03 | 5.0% |
| DOK3       | 05q35         | 5.53E-03 | 5.4% |
| DDX41      | 05q35.3       | 5.53E-03 | 5.4% |
| FAM193B    | 05q35         | 5.53E-03 | 5.4% |
| SH3TC2     | 05q32         | 5.58E-03 | 4.2% |
| HNRNPH1    | 05q35.3       | 5.85E-03 | 5.4% |
| COL23A1    | 05q35.3       | 5.96E-03 | 5.2% |

|         |           |          |      |
|---------|-----------|----------|------|
| NCCRP1  | 19q13.2   | 6.22E-03 | 5.9% |
| SYCN    | 19q13.2   | 6.22E-03 | 5.9% |
| PPIC    | 05q23.2   | 7.09E-03 | 3.6% |
| PRDM6   | 05q21-q23 | 7.18E-03 | 3.6% |
| PIK3C2G | 12p12     | 7.96E-03 | 3.5% |
| PLCZ1   | 12p13.31  | 7.96E-03 | 3.4% |
| CAPZA3  | 12p12.3   | 7.96E-03 | 3.4% |
| CYSTEM1 | 05q31.3   | 8.16E-03 | 4.8% |
| NRG2    | 05q31.2   | 8.45E-03 | 4.8% |
| PDLIM7  | 05q35.3   | 8.53E-03 | 5.3% |
| MAML1   | 05q35     | 8.66E-03 | 5.3% |
| LTC4S   | 05q35     | 8.66E-03 | 5.3% |
| CANX    | 05q35     | 8.81E-03 | 5.3% |
| SQSTM1  | 05q35     | 8.96E-03 | 5.3% |
| C5orf45 | 05q35.3   | 9.12E-03 | 5.3% |
| RNF130  | 05q35.3   | 9.46E-03 | 5.3% |
| ERGIC1  | 05q35.1   | 1.00E-02 | 5.3% |
| SARS2   | 19q13.2   | 1.03E-02 | 5.5% |
| SIRT2   | 19q13     | 1.04E-02 | 5.5% |
| NFKBIB  | 19q13.1   | 1.04E-02 | 5.5% |
| MXD3    | 05q35.3   | 1.08E-02 | 5.7% |
| RAB24   | 05q35.3   | 1.08E-02 | 5.7% |
| PRELID1 | 05q35.3   | 1.08E-02 | 5.7% |
| LMAN2   | 05q35     | 1.08E-02 | 5.7% |
| KIF3A   | 05q31     | 1.16E-02 | 4.2% |
| CCNI2   | 05q31.1   | 1.16E-02 | 4.2% |
| PRR7    | 05q35.3   | 1.16E-02 | 5.4% |
| DBN1    | 05q35.3   | 1.16E-02 | 5.4% |
| IL13    | 05q31     | 1.20E-02 | 4.2% |
| IL4     | 05q23-q31 | 1.20E-02 | 4.2% |
| UIMC1   | 05q35.2   | 1.20E-02 | 5.4% |
| RAD50   | 05q31.1   | 1.23E-02 | 4.2% |
| AEBP2   | 12p12.3   | 1.58E-02 | 3.8% |
| FGFR4   | 05q35.2   | 1.68E-02 | 5.5% |
| SOWAHA  | 05q23.3   | 1.82E-02 | 4.3% |
| MGAT4B  | 05q35     | 1.82E-02 | 5.3% |

|         |          |          |      |
|---------|----------|----------|------|
| PFDN1   | 05q31    | 1.84E-02 | 4.8% |
| TBC1D9B | 05q35.3  | 1.92E-02 | 5.3% |
| CEP120  | 05q23.2  | 1.98E-02 | 3.6% |
| DUSP1   | 05q35.1  | 2.06E-02 | 5.3% |
| RINL    | 19q13.2  | 2.11E-02 | 5.5% |
| NSD1    | 05q35    | 2.14E-02 | 5.7% |
| IFNL3   | 19q13.13 | 2.43E-02 | 5.9% |
| IFNL4   | 19q13.2  | 2.43E-02 | 5.9% |
| IFNL2   | 19q13.13 | 2.43E-02 | 5.9% |
| IFNL1   | 19q13.13 | 2.43E-02 | 5.9% |
| LRFN1   | 19q13.2  | 2.43E-02 | 5.9% |
| ECH1    | 19q13.1  | 2.92E-02 | 5.4% |
| HNRNPL  | 19q13.2  | 2.92E-02 | 5.4% |
| LGALS4  | 19q13.2  | 2.97E-02 | 5.4% |
| SLC22A5 | 05q23.3  | 3.03E-02 | 4.2% |
| GMFG    | 19q13.2  | 3.16E-02 | 6.0% |
| SAMD4B  | 19q13.2  | 3.16E-02 | 6.0% |
| PAF1    | 19q13.1  | 3.16E-02 | 6.0% |
| MED29   | 19q13.2  | 3.16E-02 | 6.0% |
| RGS14   | 05q35.3  | 3.16E-02 | 5.5% |
| SLC34A1 | 05q35.3  | 3.16E-02 | 5.5% |
| PFN3    | 05q35.2  | 3.16E-02 | 5.5% |
| RERGL   | 12p12.3  | 3.93E-02 | 3.3% |
| RYR1    | 19q13.1  | 4.01E-02 | 5.5% |
| ACTN4   | 19q13    | 4.08E-02 | 5.5% |
| UQCRQ   | 05q31.1  | 4.19E-02 | 4.3% |
| LEAP2   | 05q31.1  | 4.19E-02 | 4.3% |
| AFF4    | 05q31    | 4.19E-02 | 4.3% |
| CASC1   | 12p12.1  | 4.25E-02 | 5.2% |
| LYRM5   | 12p12.1  | 4.32E-02 | 5.2% |
| KRAS    | 12p12.1  | 4.48E-02 | 5.2% |
