# Supplementary material
Source: PubMed Central journal article supplement (PMC6382070)
Supplement: NIHMS1002246-supplement-TableS3.pdf [file NIHMS1002246-supplement-TableS3.pdf]

| <b>Gene</b> | <b>Chromosomal location</b> | <b>Q-value</b> | <b>Alteration Frequency</b> |
|-------------|-----------------------------|----------------|-----------------------------|
| SETMAR      | 03p26.2                     | 2.05E-09       | 5.8%                        |
| LHFPL4      | 03p25.3                     | 2.05E-09       | 5.7%                        |
| MTMR14      | 03p26                       | 2.05E-09       | 5.7%                        |
| CPNE9       | 03p25.3                     | 2.05E-09       | 5.7%                        |
| BRPF1       | 03p26-p25                   | 2.05E-09       | 5.6%                        |
| CAMK1       | 03p25.3                     | 2.05E-09       | 5.6%                        |
| FANCD2      | 03p25.3                     | 2.05E-09       | 5.7%                        |
| FANCD2OS    | 03p25.3                     | 2.05E-09       | 5.7%                        |
| BRK1        | 03p25.3                     | 2.05E-09       | 5.7%                        |
| VHL         | 03p25.3                     | 2.05E-09       | 5.7%                        |
| IRAK2       | 03p25.2                     | 2.05E-09       | 5.7%                        |
| TATDN2      | 03p25.3                     | 2.05E-09       | 5.7%                        |
| GHRL        | 03p26-p25                   | 2.05E-09       | 5.7%                        |
| SEC13       | 03p25-p24                   | 2.05E-09       | 5.7%                        |
| ATP2B2      | 03p25.3                     | 2.05E-09       | 5.7%                        |
| SLC6A11     | 03p25.3                     | 2.05E-09       | 5.9%                        |
| SLC6A1      | 03p25.3                     | 2.05E-09       | 5.9%                        |
| TAMM41      | 03p25.2                     | 2.05E-09       | 5.7%                        |
| SYN2        | 03p25.2                     | 2.05E-09       | 5.7%                        |
| TIMP4       | 03p25                       | 2.05E-09       | 5.7%                        |
| PPARG       | 03p25                       | 2.05E-09       | 5.7%                        |
| TSEN2       | 03p25.2                     | 2.05E-09       | 5.7%                        |
| MKRN2       | 03p25                       | 2.05E-09       | 5.7%                        |
| RAF1        | 03p25                       | 2.05E-09       | 5.7%                        |
| TMEM40      | 03p25.2                     | 2.05E-09       | 5.9%                        |
| CAND2       | 03p25.2                     | 2.05E-09       | 5.9%                        |
| RPL32       | 03q13.3-q21                 | 2.05E-09       | 5.7%                        |
| IQSEC1      | 03p25.2                     | 2.05E-09       | 5.7%                        |
| WNT7A       | 03p25                       | 2.05E-09       | 5.7%                        |
| CHCHD4      | 03p25.1                     | 2.05E-09       | 5.7%                        |
| TMEM43      | 03p25.1                     | 2.05E-09       | 5.7%                        |
| XPC         | 03p25.1                     | 2.05E-09       | 5.9%                        |
| LSM3        | 03p25.1                     | 2.05E-09       | 5.9%                        |
| SLC6A6      | 03p25.1                     | 2.05E-09       | 5.7%                        |
| GRIP2       | 03p24-p23                   | 2.05E-09       | 5.7%                        |

|          |             |          |      |
|----------|-------------|----------|------|
| CCDC174  | 03p25.1     | 2.05E-09 | 5.7% |
| C3orf20  | 03p25.1     | 2.05E-09 | 5.7% |
| FGD5     | 03p25.1     | 2.05E-09 | 6.0% |
| NR2C2    | 03p25       | 2.05E-09 | 5.9% |
| MRPS25   | 03p25       | 2.05E-09 | 5.7% |
| CAPN7    | 03p24       | 2.05E-09 | 5.9% |
| SH3BP5   | 03p24.3     | 2.05E-09 | 5.9% |
| TOP2B    | 03p24.2     | 2.05E-09 | 5.7% |
| NGLY1    | 03p23       | 2.05E-09 | 5.7% |
| OXSM     | 03p24.2     | 2.05E-09 | 5.7% |
| NEK10    | 03p24.1     | 2.05E-09 | 5.7% |
| SLC4A7   | 03p24.1     | 2.05E-09 | 5.7% |
| CMC1     | 03p24.1     | 2.05E-09 | 5.9% |
| AZI2     | 03p23       | 2.05E-09 | 5.9% |
| ZCWPW2   | 03p23       | 2.05E-09 | 5.9% |
| GADL1    | 03p24.1-p23 | 2.05E-09 | 6.4% |
| GPD1L    | 03p22.3     | 2.05E-09 | 5.8% |
| CMTM8    | 03p22.2     | 2.05E-09 | 5.8% |
| EOMES    | 03p24.1     | 2.11E-09 | 5.7% |
| GRM7     | 03p26-p25   | 3.52E-09 | 6.6% |
| CMTM6    | 03p22.2     | 3.52E-09 | 5.6% |
| DYNC1LI1 | 03p23       | 3.52E-09 | 5.6% |
| CNOT10   | 03p23       | 3.52E-09 | 5.6% |
| TRIM71   | 03p22.3     | 3.52E-09 | 5.6% |
| CCR4     | 03p24-p21.3 | 3.52E-09 | 5.6% |
| GLB1     | 03p22.3     | 3.52E-09 | 5.6% |
| TMPPE    | 03p22.3     | 3.52E-09 | 5.6% |
| CRTAP    | 03p22       | 3.52E-09 | 5.6% |
| SUSD5    | 03p23       | 3.52E-09 | 5.6% |
| CLASP2   | 03p24.3     | 3.52E-09 | 5.6% |
| PDCD6IP  | 03p22.3     | 3.64E-09 | 5.6% |
| ITPR1    | 03p26.1     | 3.64E-09 | 6.1% |
| LMCD1    | 03p26-p24   | 3.64E-09 | 5.5% |
| SSUH2    | 03p25.3     | 3.64E-09 | 5.5% |
| CAV3     | 03p25       | 3.64E-09 | 5.5% |
| OXTR     | 03p25       | 3.64E-09 | 5.5% |

|          |              |          |      |
|----------|--------------|----------|------|
| STT3B    | 03p24.1      | 3.64E-09 | 5.6% |
| OXSRI    | 03p22.2      | 3.64E-09 | 5.6% |
| SLC22A13 | 03p22.2      | 3.64E-09 | 5.6% |
| ARL8B    | 03p26.1      | 4.33E-09 | 5.5% |
| EDEM1    | 03p26.1      | 4.33E-09 | 5.5% |
| BHLHE40  | 03p26        | 4.55E-09 | 5.4% |
| SRGAP3   | 03p25.3      | 5.40E-09 | 6.0% |
| METTL6   | 03p25.1      | 5.55E-09 | 5.9% |
| EAF1     | 03p25.1      | 5.55E-09 | 5.9% |
| STAC     | 03p22.3      | 5.55E-09 | 5.4% |
| GOLGA4   | 03p22-p21.3  | 5.55E-09 | 5.5% |
| VILL     | 03p21        | 5.55E-09 | 5.5% |
| PLCD1    | 03p22-p21.3  | 5.55E-09 | 5.5% |
| DLEC1    | 03p21.3      | 5.55E-09 | 5.5% |
| ACAA1    | 03p22.2      | 5.55E-09 | 5.5% |
| MYD88    | 03p22        | 5.55E-09 | 5.5% |
| SLC22A14 | 03p21.3      | 5.55E-09 | 5.5% |
| XYLB     | 03p22-p21.3  | 5.55E-09 | 5.5% |
| ACVR2B   | 03p22        | 5.55E-09 | 5.5% |
| SCN10A   | 03p22.2      | 5.55E-09 | 5.5% |
| SCN11A   | 03p22.2      | 5.55E-09 | 5.5% |
| WDR48    | 03p21.33     | 5.55E-09 | 5.5% |
| GORASP1  | 03p22-p21.33 | 5.55E-09 | 5.5% |
| TTC21A   | 03p22.2      | 5.55E-09 | 5.5% |
| CSRNP1   | 03p22        | 5.55E-09 | 5.5% |
| XIRP1    | 03p21.33     | 5.55E-09 | 5.5% |
| CX3CR1   | 03p21.3      | 5.55E-09 | 5.5% |
| CCR8     | 03p22        | 5.55E-09 | 5.5% |
| SLC25A38 | 03p22.1      | 5.55E-09 | 5.5% |
| RPSA     | 03p21.3      | 5.55E-09 | 5.5% |
| MOBP     | 03p21.33     | 5.55E-09 | 5.5% |
| MYRIP    | 03p21.33     | 5.55E-09 | 5.5% |
| EIF1B    | 03p22.1      | 5.55E-09 | 5.5% |
| ENTPD3   | 03p21.3      | 5.55E-09 | 5.5% |
| RPL14    | 03p22-p21.2  | 5.55E-09 | 5.5% |
| ZNF619   | 03p21.33     | 5.55E-09 | 5.5% |

|         |               |          |      |
|---------|---------------|----------|------|
| ZNF620  | 03p21.33      | 5.55E-09 | 5.5% |
| ZNF621  | 03p21.33      | 5.55E-09 | 5.5% |
| SNRK    | 03p22.1       | 5.55E-09 | 5.6% |
| DCLK3   | 03p22.3       | 5.57E-09 | 5.4% |
| RFTN1   | 03p24.3       | 5.66E-09 | 5.9% |
| THUMPD3 | 03p25.3       | 7.84E-09 | 5.8% |
| SETD5   | 03p25.3       | 7.84E-09 | 5.8% |
| CTNNB1  | 03p21         | 7.84E-09 | 6.0% |
| UBE2E2  | 03p24.2       | 8.26E-09 | 5.9% |
| TGFBR2  | 03p22         | 9.16E-09 | 6.4% |
| ZBTB47  | 03p22.1       | 9.16E-09 | 5.4% |
| KLHL40  | 03p21.33      | 9.16E-09 | 5.4% |
| CCDC13  | 03p22.1       | 9.16E-09 | 5.4% |
| HHATL   | 03p22         | 9.16E-09 | 5.4% |
| HIGD1A  | 03p22.1       | 9.16E-09 | 5.4% |
| NKTR    | 03p22.1       | 9.37E-09 | 5.4% |
| SEC22C  | 03p24.3-p22.1 | 9.45E-09 | 5.4% |
| SS18L2  | 03p21         | 9.45E-09 | 5.4% |
| CCK     | 03p22.1       | 9.67E-09 | 5.4% |
| GALNT15 | 03p25.1       | 1.05E-08 | 5.8% |
| BTD     | 03p25         | 1.07E-08 | 5.8% |
| DPH3    | 03p25.1       | 1.08E-08 | 5.8% |
| OXNAD1  | 03p25-p24     | 1.08E-08 | 5.8% |
| SATB1   | 03p24.3       | 1.13E-08 | 5.7% |
| EFHB    | 03p24.3       | 1.13E-08 | 5.8% |
| RAB5A   | 03p24-p22     | 1.13E-08 | 5.8% |
| PP2D1   | 03p24.3       | 1.13E-08 | 5.8% |
| HDAC11  | 03p25.1       | 1.27E-08 | 5.7% |
| OGG1    | 03p26         | 1.38E-08 | 5.6% |
| TADA3   | 03p25.3       | 1.38E-08 | 5.6% |
| ARPC4   | 03p25         | 1.38E-08 | 5.6% |
| TTLL3   | 03p25.3       | 1.38E-08 | 5.6% |
| RPUSD3  | 03p25.3       | 1.38E-08 | 5.6% |
| CIDEC   | 03p25         | 1.38E-08 | 5.7% |
| JAGN1   | 03p25.2       | 1.38E-08 | 5.7% |
| IL17RE  | 03p25.3       | 1.38E-08 | 5.7% |

|         |           |          |      |
|---------|-----------|----------|------|
| IL17RC  | 03p25.3   | 1.38E-08 | 5.7% |
| CRELD1  | 03p25.3   | 1.38E-08 | 5.7% |
| PRRT3   | 03p25.3   | 1.38E-08 | 5.7% |
| EMC3    | 03p25.3   | 1.38E-08 | 5.7% |
| THRB    | 03p24.2   | 1.38E-08 | 5.7% |
| OSBPL10 | 03p23     | 1.38E-08 | 5.8% |
| CMTM7   | 03p22.2   | 1.38E-08 | 5.8% |
| LRRC3B  | 03p24     | 1.42E-08 | 5.7% |
| RPL15   | 03p24.1   | 1.44E-08 | 5.7% |
| NR1D2   | 03p24.1   | 1.44E-08 | 5.7% |
| UBE2E1  | 03p24.2   | 1.46E-08 | 5.7% |
| NKIRAS1 | 03p24.1   | 1.46E-08 | 5.7% |
| ACKR2   | 03p21.3   | 1.65E-08 | 5.2% |
| CYP8B1  | 03p22.1   | 1.65E-08 | 5.2% |
| ZNF662  | 03p22.1   | 1.68E-08 | 5.2% |
| LRRN1   | 03p26.2   | 1.69E-08 | 5.6% |
| KRBOX1  | 03p22.1   | 1.69E-08 | 5.2% |
| FAM198A | 03p22.1   | 1.69E-08 | 5.2% |
| PLCL2   | 03p24.3   | 2.26E-08 | 6.1% |
| ZNF385D | 03p24.3   | 2.35E-08 | 6.1% |
| FBXL2   | 03p22.3   | 2.60E-08 | 5.6% |
| UBP1    | 03p22.3   | 2.60E-08 | 5.6% |
| RBMS3   | 03p24-p23 | 2.63E-08 | 7.3% |
| ZNF860  | 03p24.1   | 2.70E-08 | 5.6% |
| RAD18   | 03p25.3   | 3.16E-08 | 5.5% |
| COLQ    | 03p       | 3.73E-08 | 5.9% |
| HACL1   | 03p24.3   | 3.73E-08 | 5.9% |
| NUP210  | 03p25     | 4.76E-08 | 5.9% |
| HRH1    | 03p25     | 4.78E-08 | 5.9% |
| FYCO1   | 03p21.3   | 4.99E-08 | 5.6% |
| LTF     | 03p21.31  | 5.84E-08 | 5.6% |
| ABHD5   | 03p21.33  | 5.92E-08 | 5.6% |
| ULK4    | 03p22.1   | 6.22E-08 | 6.0% |
| CTDSPL  | 03p21.3   | 6.29E-08 | 5.5% |
| EXOG    | 03p21.3   | 6.29E-08 | 5.5% |
| LRRFIP2 | 03p22.1   | 6.29E-08 | 5.5% |

|          |                |          |      |
|----------|----------------|----------|------|
| SCN5A    | 03p21          | 6.37E-08 | 5.5% |
| TRANK1   | 03p22.2        | 6.57E-08 | 5.4% |
| KAT2B    | 03p24          | 8.69E-08 | 5.8% |
| SGOL1    | 03p24.3        | 8.71E-08 | 5.8% |
| LZTFL1   | 03p21.3        | 1.05E-07 | 5.5% |
| CCR9     | 03p21.31       | 1.05E-07 | 5.5% |
| SACM1L   | 03p21.3        | 1.08E-07 | 5.5% |
| XCR1     | 03p21.3-p21.1  | 1.08E-07 | 5.5% |
| LIMD1    | 03p21.31       | 1.13E-07 | 5.5% |
| CCR3     | 03p21.3        | 1.13E-07 | 5.4% |
| CCR1     | 03p21          | 1.13E-07 | 5.4% |
| LYZL4    | 03p21.33       | 1.13E-07 | 5.4% |
| VIPR1    | 03p22          | 1.15E-07 | 5.4% |
| TGM4     | 03p22-p21.33   | 1.15E-07 | 5.4% |
| LARS2    | 03p21.3        | 1.17E-07 | 5.4% |
| TMEM42   | 03p21.31       | 1.17E-07 | 5.4% |
| RTP3     | 03p21.3        | 1.17E-07 | 5.4% |
| TRAK1    | 03p22.1        | 1.18E-07 | 5.4% |
| ZKSCAN7  | 03p21.32       | 1.18E-07 | 5.4% |
| ZNF660   | 03p21.32       | 1.18E-07 | 5.4% |
| ZNF197   | 03p21          | 1.18E-07 | 5.4% |
| ZNF35    | 03p21.32       | 1.18E-07 | 5.4% |
| ZNF502   | 03p21.32       | 1.18E-07 | 5.4% |
| ZNF501   | 03p21.32       | 1.18E-07 | 5.4% |
| KIAA1143 | 03p21.31       | 1.18E-07 | 5.4% |
| KIF15    | 03p21.31       | 1.18E-07 | 5.4% |
| TBC1D5   | 03p24.3        | 1.53E-07 | 6.4% |
| VGLL4    | 03p25.2        | 2.12E-07 | 6.7% |
| SMARCC1  | 03p21.31       | 2.13E-07 | 5.8% |
| CXCR6    | 03p21          | 2.18E-07 | 5.3% |
| ANO10    | 03p22.1-p21.33 | 2.24E-07 | 5.7% |
| ZDHHC3   | 03p21.31       | 2.34E-07 | 5.3% |
| EXOSC7   | 03p21.32       | 2.34E-07 | 5.3% |
| CLEC3B   | 03p22-p21.3    | 2.34E-07 | 5.3% |
| CDCP1    | 03p21.3        | 2.40E-07 | 5.3% |
| FBLN2    | 03p25-p24      | 2.83E-07 | 5.9% |

|          |               |          |      |
|----------|---------------|----------|------|
| SUMF1    | 03p26.1       | 2.91E-07 | 6.3% |
| ATG7     | 03p25.3-p25.2 | 4.09E-07 | 6.5% |
| CSPG5    | 03p21.3       | 4.25E-07 | 5.6% |
| DHX30    | 03p24.3-p22.1 | 4.40E-07 | 5.6% |
| SETD2    | 03p21.31      | 4.46E-07 | 5.6% |
| KIF9     | 03p21.31      | 4.46E-07 | 5.6% |
| ZNF445   | 03p21.32      | 4.71E-07 | 5.6% |
| ANKRD28  | 03p25.1       | 4.86E-07 | 5.8% |
| KCNH8    | 03p24.3       | 4.88E-07 | 5.8% |
| ARPP21   | 03p24.3       | 4.88E-07 | 5.4% |
| TMEM158  | 03p21.31      | 4.88E-07 | 5.1% |
| DAZL     | 03p24         | 5.03E-07 | 5.7% |
| EPM2AIP1 | 03p22.1       | 5.03E-07 | 5.4% |
| MLH1     | 03p22.3       | 5.03E-07 | 5.4% |
| RARB     | 03p24         | 6.90E-07 | 5.7% |
| SLC6A20  | 03p21.6       | 8.24E-07 | 5.5% |
| ALS2CL   | 03p21.31      | 8.49E-07 | 5.5% |
| TMIE     | 03p21         | 8.49E-07 | 5.5% |
| PRSS50   | 03p21.31      | 8.49E-07 | 5.5% |
| PRSS46   | 03p21.31      | 8.49E-07 | 5.5% |
| KLHL18   | 03p21         | 8.65E-07 | 5.5% |
| PRSS45   | 03p21.31      | 8.73E-07 | 5.4% |
| CCR2     | 03p21         | 8.74E-07 | 5.4% |
| CCR5     | 03p21         | 8.74E-07 | 5.4% |
| LRRC2    | 03p21.3       | 8.74E-07 | 5.5% |
| PRSS42   | 03p21.31      | 8.74E-07 | 5.4% |
| MYL3     | 03p           | 8.74E-07 | 5.4% |
| PTH1R    | 03p22-p21.1   | 8.74E-07 | 5.4% |
| CCDC12   | 03p21.31      | 8.74E-07 | 5.4% |
| NBEAL2   | 03p21.31      | 8.91E-07 | 5.4% |
| ZNF852   | 03p21.32      | 9.06E-07 | 5.4% |
| CRBN     | 03p26.3       | 1.61E-06 | 5.5% |
| IL5RA    | 03p26-p24     | 1.63E-06 | 5.5% |
| TRNT1    | 03p25.1       | 1.63E-06 | 5.5% |
| CHL1     | 03p26         | 1.98E-06 | 5.8% |
| CNTN6    | 03p26.3       | 1.98E-06 | 5.8% |

|         |                 |          |      |
|---------|-----------------|----------|------|
| ELP6    | 03p21.31        | 2.46E-06 | 5.6% |
| MAP4    | 03p21           | 2.58E-06 | 5.6% |
| TOPAZ1  | 03p21.33        | 2.60E-06 | 5.6% |
| TCAIM   | 03p21.33-p21.32 | 2.67E-06 | 5.6% |
| ITGA9   | 03p21.3         | 2.82E-06 | 5.5% |
| CAMP    | 03p21.3         | 4.83E-06 | 5.5% |
| ZNF589  | 03p21           | 4.90E-06 | 5.5% |
| NME6    | 03p21.31        | 4.90E-06 | 5.5% |
| TDGF1   | 03p21.31        | 5.09E-06 | 5.5% |
| CDC25A  | 03p21           | 5.09E-06 | 5.5% |
| SPINK8  | 03p21.31        | 5.09E-06 | 5.5% |
| FBXW12  | 03p21.31        | 5.09E-06 | 5.5% |
| PLXNB1  | 03p21.31        | 5.09E-06 | 5.5% |
| CCDC51  | 03p21.31        | 5.09E-06 | 5.5% |
| TMA7    | 03p21.31        | 5.09E-06 | 5.5% |
| ATRIP   | 03p21.31        | 5.09E-06 | 5.5% |
| SHISA5  | 03p21.31        | 5.09E-06 | 5.5% |
| TREX1   | 03p21.31        | 5.09E-06 | 5.5% |
| KLHDC8B | 03p21.31        | 1.42E-05 | 5.7% |
| C3orf84 | 03p21.31        | 1.42E-05 | 5.7% |
| LAMB2   | 03p21.3-p21.2   | 1.45E-05 | 5.7% |
| CCDC71  | 03p21.31        | 1.45E-05 | 5.7% |
| TCTA    | 03p21           | 1.48E-05 | 5.7% |
| AMT     | 03p21.31        | 1.48E-05 | 5.7% |
| NICN1   | 03p21.31        | 1.48E-05 | 5.7% |
| RHOA    | 03p21.3         | 1.51E-05 | 5.7% |
| CNTN4   | 03p26.3         | 1.83E-05 | 6.0% |
| PTPN23  | 03p21.3         | 2.43E-05 | 5.5% |
| SCAP    | 03p21.31        | 2.43E-05 | 5.5% |
| PFKFB4  | 03p22-p21       | 2.51E-05 | 5.5% |
| UCN2    | 03p21.3         | 2.51E-05 | 5.5% |
| COL7A1  | 03p21.1         | 2.56E-05 | 5.5% |
| UQCRC1  | 03p21           | 2.56E-05 | 5.5% |
| IP6K2   | 03p21.31        | 2.59E-05 | 5.5% |
| CCDC36  | 03p21.31        | 2.79E-05 | 5.5% |
| PRKAR2A | 03p21.3-p21.2   | 2.82E-05 | 5.5% |



|          |               |          |      |
|----------|---------------|----------|------|
| QARS     | 03p21.31      | 2.82E-05 | 5.5% |
| USP19    | 03p21.31      | 2.82E-05 | 5.5% |
| C3orf62  | 03p21.31      | 2.82E-05 | 5.5% |
| USP4     | 03p21.3       | 2.82E-05 | 5.5% |
| GPX1     | 03p21.3       | 2.87E-05 | 5.5% |
| DAG1     | 03p21         | 3.03E-05 | 5.5% |
| NCKIPSD  | 03p21         | 4.98E-05 | 5.3% |
| TMEM89   | 03p21.31      | 5.06E-05 | 5.3% |
| SLC26A6  | 03p21.31      | 5.06E-05 | 5.3% |
| CELSR3   | 03p21.31      | 5.06E-05 | 5.3% |
| SLC25A20 | 03p21.31      | 5.38E-05 | 5.3% |
| ARIH2OS  | 03p21.31      | 5.38E-05 | 5.3% |
| APEH     | 03p21         | 5.53E-05 | 5.3% |
| MST1     | 03p21         | 5.53E-05 | 5.3% |
| BSN      | 03p21         | 5.91E-05 | 5.3% |
| ARIH2    | 03p21         | 1.08E-04 | 5.5% |
| P4HTM    | 03p21.31      | 1.08E-04 | 5.5% |
| MANF     | 03p21.1       | 2.02E-04 | 5.4% |
| RBM15B   | 03p21.1       | 2.02E-04 | 5.4% |
| IQCF5    | 03p21.1       | 2.02E-04 | 5.4% |
| IQCF1    | 03p21.31      | 2.02E-04 | 5.4% |
| RRP9     | 03p21.31      | 2.02E-04 | 5.4% |
| ACY1     | 03p21.2       | 2.02E-04 | 5.4% |
| RPL29    | 03p21.3-p21.2 | 2.02E-04 | 5.4% |
| DUSP7    | 03p21         | 2.02E-04 | 5.4% |
| PARP3    | 03p21.2       | 2.02E-04 | 5.4% |
| GPR62    | 03p21.1       | 2.02E-04 | 5.4% |
| PCBP4    | 03p21         | 2.02E-04 | 5.4% |
| ABHD14B  | 03p21.2       | 2.02E-04 | 5.4% |
| ABHD14A  | 03p21.1       | 2.02E-04 | 5.4% |
| POC1A    | 03p21.2       | 2.02E-04 | 5.4% |
| AMIGO3   | 03p21         | 2.06E-04 | 5.3% |
| GMPPB    | 03p21.31      | 2.06E-04 | 5.3% |
| IQCF3    | 03p21.31      | 2.06E-04 | 5.3% |
| IQCF2    | 03p21.31      | 2.06E-04 | 5.3% |
| ALAS1    | 03p21         | 2.09E-04 | 5.3% |

|          |           |          |      |
|----------|-----------|----------|------|
| RNF123   | 03p24.3   | 2.10E-04 | 5.3% |
| DOCK3    | 03p21     | 2.84E-04 | 5.9% |
| WDR82    | 03p21.2   | 3.56E-04 | 5.5% |
| WDR6     | 03p21.31  | 3.58E-04 | 5.5% |
| DALRD3   | 03p21.31  | 3.58E-04 | 5.5% |
| NDUFAF3  | 03p21.31  | 3.58E-04 | 5.5% |
| IMPDH2   | 03p21.2   | 3.58E-04 | 5.5% |
| QRICH1   | 03p21.31  | 3.67E-04 | 5.5% |
| CACNA2D2 | 03p21.3   | 3.72E-04 | 5.5% |
| GNAT1    | 03p21     | 3.74E-04 | 5.5% |
| SLC38A3  | 03p21.3   | 3.74E-04 | 5.5% |
| GNAI2    | 03p21.31  | 3.74E-04 | 5.5% |
| SEMA3B   | 03p21.3   | 3.74E-04 | 5.5% |
| LSMEM2   | 03p21.31  | 3.74E-04 | 5.5% |
| IFRD2    | 03p21.3   | 3.74E-04 | 5.5% |
| HYAL3    | 03p21.3   | 3.74E-04 | 5.5% |
| HYAL1    | 03p21.31  | 3.74E-04 | 5.5% |
| NAT6     | 03p21.3   | 3.74E-04 | 5.5% |
| HYAL2    | 03p21.3   | 3.74E-04 | 5.5% |
| TUSC2    | 03p21.3   | 3.74E-04 | 5.5% |
| RASSF1   | 03p21.3   | 3.74E-04 | 5.5% |
| ZMYND10  | 03p21.3   | 3.74E-04 | 5.5% |
| NPRL2    | 03p21.3   | 3.74E-04 | 5.5% |
| CYB561D2 | 03p21.3   | 3.74E-04 | 5.5% |
| TMEM115  | 03p21.31  | 3.74E-04 | 5.5% |
| IP6K1    | 03p21.31  | 3.79E-04 | 5.1% |
| WNT5A    | 03p21-p14 | 3.98E-04 | 4.8% |
| MAPKAPK3 | 03p21.3   | 6.17E-04 | 5.4% |
| CISH     | 03p21.3   | 6.19E-04 | 5.3% |
| VPRBP    | 03p21.2   | 6.24E-04 | 5.4% |
| RAD54L2  | 03p21.2   | 6.24E-04 | 5.4% |
| C3orf18  | 03p21.3   | 6.28E-04 | 5.3% |
| HEMK1    | 03p21     | 6.28E-04 | 5.3% |
| TEX264   | 03p21     | 6.32E-04 | 5.3% |
| GRM2     | 03p21.2   | 6.32E-04 | 5.3% |
| IQCF6    | 03p21.1   | 6.32E-04 | 5.3% |

|          |          |          |      |
|----------|----------|----------|------|
| MST1R    | 03p21    | 6.34E-04 | 5.3% |
| MON1A    | 03p21.31 | 6.34E-04 | 5.3% |
| RBM6     | 03p21.3  | 6.34E-04 | 5.3% |
| TLR9     | 03p21.3  | 6.34E-04 | 5.3% |
| TWF2     | 03p21.1  | 6.34E-04 | 5.3% |
| PPM1M    | 03p21.31 | 6.34E-04 | 5.3% |
| CACNA1D  | 03p14.3  | 6.66E-04 | 5.0% |
| GLYCTK   | 03p21.1  | 6.69E-04 | 5.3% |
| SEMA3F   | 03p21.3  | 6.71E-04 | 5.3% |
| DCP1A    | 03p21.1  | 7.16E-04 | 5.0% |
| LRTM1    | 03p14.3  | 7.28E-04 | 5.0% |
| CACNA2D3 | 03p21.1  | 1.01E-03 | 5.5% |
| ITIH1    | 03p21.1  | 1.02E-03 | 5.5% |
| GLT8D1   | 03p21.1  | 1.02E-03 | 5.5% |
| SPCS1    | 03p21.31 | 1.02E-03 | 5.5% |
| NEK4     | 03p21.1  | 1.02E-03 | 5.5% |
| ITIH3    | 03p21.1  | 1.02E-03 | 5.5% |
| ITIH4    | 03p21.1  | 1.02E-03 | 5.5% |
| MUSTN1   | 03p21.31 | 1.02E-03 | 5.5% |
| TMEM110  | 03p21.1  | 1.02E-03 | 5.5% |
| GNL3     | 03p21.1  | 1.04E-03 | 5.5% |
| ERC2     | 03p14.3  | 1.06E-03 | 5.5% |
| SFMBT1   | 03p21.31 | 1.08E-03 | 5.5% |
| CDHR4    | 03p21.31 | 1.13E-03 | 5.1% |
| FAM212A  | 03p21.31 | 1.13E-03 | 5.1% |
| UBA7     | 03p21    | 1.13E-03 | 5.1% |
| TRAIP    | 03p21.31 | 1.15E-03 | 5.1% |
| CAMKV    | 03p21.31 | 1.15E-03 | 5.1% |
| PRKCD    | 03p21.31 | 1.15E-03 | 5.2% |
| TKT      | 03p14.3  | 1.15E-03 | 5.2% |
| RFT1     | 03p21.1  | 1.20E-03 | 5.1% |
| RBM5     | 03p21.3  | 1.22E-03 | 5.1% |
| PXK      | 03p21.2  | 1.44E-03 | 4.1% |
| CHDH     | 03p21    | 2.37E-03 | 4.6% |
| IL17RB   | 03p21.1  | 2.37E-03 | 4.6% |
| ACTR8    | 03p21.31 | 2.37E-03 | 4.6% |

|          |               |          |      |
|----------|---------------|----------|------|
| KCTD6    | 03p21.2       | 5.72E-03 | 3.7% |
| ACOX2    | 03p14.3       | 5.72E-03 | 3.7% |
| PDHB     | 03p21.1-p14.2 | 5.77E-03 | 3.7% |
| FAM107A  | 03p14.2       | 5.77E-03 | 3.7% |
| SMIM4    | 03p21.1       | 6.91E-03 | 5.5% |
| PBRM1    | 03p21         | 7.64E-03 | 5.5% |
| FAM208A  | 03p14.3       | 8.33E-03 | 4.6% |
| RPP14    | 03p21.2       | 1.11E-02 | 3.9% |
| C3orf67  | 03p14.2       | 1.15E-02 | 3.5% |
| FAM3D    | 03p21.1       | 1.17E-02 | 3.5% |
| NISCH    | 03p21.1       | 1.20E-02 | 5.3% |
| STAB1    | 03p21.31      | 1.20E-02 | 5.3% |
| NT5DC2   | 03p21.1       | 1.20E-02 | 5.3% |
| SEMA3G   | 03p21.1       | 1.22E-02 | 5.3% |
| TNNC1    | 03p21.1       | 1.22E-02 | 5.3% |
| ARHGEF3  | 03p14.3       | 1.27E-02 | 4.8% |
| CCDC66   | 03p14.3       | 1.50E-02 | 4.4% |
| BAP1     | 03p21.1       | 1.58E-02 | 5.5% |
| DNAH1    | 03p21-p14     | 1.61E-02 | 5.5% |
| PHF7     | 03p21.31      | 1.61E-02 | 5.5% |
| ABHD6    | 03p21.2       | 2.15E-02 | 3.7% |
| APPL1    | 03p14.3       | 2.75E-02 | 4.2% |
| ASB14    | 03p21.1       | 2.75E-02 | 4.2% |
| DNAH12   | 03p21.1       | 2.75E-02 | 4.2% |
| HESX1    | 03p14.3       | 2.80E-02 | 4.2% |
| FLNB     | 03p14.3       | 3.39E-02 | 3.9% |
| DNASE1L3 | 03p14.3       | 3.86E-02 | 3.5% |
| IL17RD   | 03p21.1       | 4.07E-02 | 4.4% |
| PDE12    | 03p14.3       | 4.92E-02 | 4.1% |
