# Supplementary material
Source: PubMed Central journal article supplement (PMC6382070)
Supplement: NIHMS1002246-supplement-TableS5.pdf [file NIHMS1002246-supplement-TableS5.pdf]

| <i>Gene</i> | <b>Lung</b><br><i>Signed log<sub>10</sub> (p-value)</i> | <b>Prostate</b><br><i>Signed log<sub>10</sub> (p-value)</i> | <i>Methylation Status in Small Cell</i> |
|-------------|---------------------------------------------------------|-------------------------------------------------------------|-----------------------------------------|
| CPT1C       | -16.69                                                  | -4.83                                                       | Hypomethylated                          |
| NACAD       | -15.44                                                  | -2.52                                                       | Hypomethylated                          |
| HES6        | -15.07                                                  | -4.99                                                       | Hypomethylated                          |
| CDK5R2      | -14.92                                                  | -4.00                                                       | Hypomethylated                          |
| PHYHIPL     | -14.50                                                  | -2.85                                                       | Hypomethylated                          |
| TUBB2B      | -13.38                                                  | -2.60                                                       | Hypomethylated                          |
| TRIM9       | -13.29                                                  | -3.54                                                       | Hypomethylated                          |
| UCP2        | -12.83                                                  | -1.87                                                       | Hypomethylated                          |
| INA         | -12.80                                                  | -3.76                                                       | Hypomethylated                          |
| ONECUT2     | -12.33                                                  | -3.33                                                       | Hypomethylated                          |
| CCKBR       | -12.17                                                  | -1.34                                                       | Hypomethylated                          |
| GPR173      | -11.75                                                  | -5.54                                                       | Hypomethylated                          |
| CNTNAP5     | -11.62                                                  | -1.62                                                       | Hypomethylated                          |
| STK33       | -11.53                                                  | -1.45                                                       | Hypomethylated                          |
| TAGLN3      | -11.34                                                  | -3.04                                                       | Hypomethylated                          |
| VGF         | -11.15                                                  | -3.54                                                       | Hypomethylated                          |
| ARNT2       | -10.98                                                  | -2.36                                                       | Hypomethylated                          |
| SLC25A34    | -10.81                                                  | -2.21                                                       | Hypomethylated                          |
| KIF5A       | -10.64                                                  | -3.82                                                       | Hypomethylated                          |
| MARCH11     | -10.51                                                  | -1.51                                                       | Hypomethylated                          |
| RPRM        | -10.51                                                  | -1.45                                                       | Hypomethylated                          |
| KIT         | -10.22                                                  | -2.68                                                       | Hypomethylated                          |
| KIF3C       | -10.19                                                  | -4.83                                                       | Hypomethylated                          |
| ASCL1       | -9.83                                                   | -1.73                                                       | Hypomethylated                          |
| FADS2       | -9.75                                                   | -1.45                                                       | Hypomethylated                          |
| MANEAL      | -9.53                                                   | -1.51                                                       | Hypomethylated                          |
| SHISA2      | -9.32                                                   | -3.13                                                       | Hypomethylated                          |
| SLC43A1     | -9.29                                                   | -5.16                                                       | Hypomethylated                          |
| FUZ         | -9.27                                                   | -3.88                                                       | Hypomethylated                          |
| COL2A1      | -9.14                                                   | -1.62                                                       | Hypomethylated                          |
| KCNK13      | -8.95                                                   | -2.21                                                       | Hypomethylated                          |
| ZNF853      | -8.83                                                   | -3.04                                                       | Hypomethylated                          |
| C20orf85    | -8.74                                                   | -2.29                                                       | Hypomethylated                          |
| PRR18       | -8.69                                                   | -3.76                                                       | Hypomethylated                          |

|          |       |       |                |
|----------|-------|-------|----------------|
| KCNH8    | -8.57 | -1.81 | Hypomethylated |
| SLC10A4  | -8.48 | -2.14 | Hypomethylated |
| MED12L   | -8.43 | -1.68 | Hypomethylated |
| MIAT     | -8.27 | -1.81 | Hypomethylated |
| NPTX1    | -8.04 | -2.60 | Hypomethylated |
| CAND2    | -7.93 | -1.52 | Hypomethylated |
| RALGPS1  | -7.45 | -2.21 | Hypomethylated |
| HOXD11   | -7.35 | -2.68 | Hypomethylated |
| STMN1    | -7.35 | -1.56 | Hypomethylated |
| B3GNT8   | -7.35 | -1.34 | Hypomethylated |
| CACNA2D3 | -7.31 | -2.14 | Hypomethylated |
| ADCYAP1  | -6.85 | -2.14 | Hypomethylated |
| TEKT2    | -6.55 | -4.99 | Hypomethylated |
| SLC38A3  | -6.42 | -2.85 | Hypomethylated |
| PCDHB1   | -6.21 | -1.56 | Hypomethylated |
| TUBA3C   | -5.94 | -2.68 | Hypomethylated |
| MCOLN3   | -5.89 | -3.88 | Hypomethylated |
| RGS16    | -5.42 | -5.16 | Hypomethylated |
| ASB16    | -5.34 | -1.84 | Hypomethylated |
| ZNF556   | -5.26 | -1.68 | Hypomethylated |
| ENO3     | -5.08 | -1.34 | Hypomethylated |
| PNMA1    | -4.82 | -1.81 | Hypomethylated |
| RAB3B    | -4.74 | -3.23 | Hypomethylated |
| SLC25A25 | -4.56 | -2.07 | Hypomethylated |
| YPEL3    | -4.51 | -2.68 | Hypomethylated |
| SLC35D3  | -4.47 | -3.43 | Hypomethylated |
| PATZ1    | -4.31 | -5.74 | Hypomethylated |
| OPRK1    | -4.28 | -2.77 | Hypomethylated |
| RNF165   | -4.19 | -5.54 | Hypomethylated |
| NNT      | -4.15 | -1.69 | Hypomethylated |
| CKB      | -4.15 | -1.56 | Hypomethylated |
| CHRNA2   | -4.02 | -2.85 | Hypomethylated |
| CNNM1    | -3.96 | -1.74 | Hypomethylated |
| NEURL4   | -3.79 | -1.34 | Hypomethylated |
| SFRP5    | -3.52 | -2.94 | Hypomethylated |
| ZNF785   | -3.42 | -3.33 | Hypomethylated |

|          |       |       |                 |
|----------|-------|-------|-----------------|
| FOXD1    | -3.42 | -2.77 | Hypomethylated  |
| LRRC34   | -3.42 | -2.52 | Hypomethylated  |
| TMUB1    | -3.41 | -4.25 | Hypomethylated  |
| PCSK2    | -2.75 | -1.87 | Hypomethylated  |
| ST6GAL2  | -2.74 | -2.60 | Hypomethylated  |
| CABP7    | -2.66 | -2.07 | Hypomethylated  |
| FANCC    | -2.61 | -2.52 | Hypomethylated  |
| IGFBPL1  | -2.43 | -2.44 | Hypomethylated  |
| IL1RL2   | -2.27 | -2.08 | Hypomethylated  |
| GFRA3    | -2.25 | -1.68 | Hypomethylated  |
| ZNF135   | -2.02 | -1.62 | Hypomethylated  |
| RBP1     | -1.97 | -2.14 | Hypomethylated  |
| GNB1     | -1.85 | -2.00 | Hypomethylated  |
| RNF182   | -1.66 | -2.28 | Hypomethylated  |
| TFF3     | -1.59 | -3.65 | Hypomethylated  |
| CRABP2   | -1.56 | -1.74 | Hypomethylated  |
| DEPDC7   | -1.54 | -1.40 | Hypomethylated  |
| PTGER1   | -1.43 | -1.40 | Hypomethylated  |
| ARMCX4   | -1.38 | -1.38 | Hypomethylated  |
| THBD     | 1.35  | 2.44  | Hypermethylated |
| INPP5A   | 1.69  | 2.21  | Hypermethylated |
| MAP7D3   | 1.74  | 2.52  | Hypermethylated |
| AKR1B1   | 1.76  | 2.44  | Hypermethylated |
| SERPINB9 | 1.95  | 2.60  | Hypermethylated |
| NEK6     | 3.09  | 4.12  | Hypermethylated |
| HGD      | 3.23  | 3.54  | Hypermethylated |
| TMEM106A | 3.49  | 4.53  | Hypermethylated |
| SLC25A30 | 3.65  | 4.53  | Hypermethylated |
| MDFIC    | 3.91  | 2.29  | Hypermethylated |
| TCTEX1D4 | 4.07  | 1.45  | Hypermethylated |
| SDC1     | 4.27  | 2.21  | Hypermethylated |
| HIST1H1A | 4.86  | 3.23  | Hypermethylated |
| LY75     | 5.09  | 1.40  | Hypermethylated |
| SNX9     | 5.17  | 2.85  | Hypermethylated |
| FKBP5    | 5.25  | 5.54  | Hypermethylated |
| ZBTB7A   | 5.48  | 2.00  | Hypermethylated |

|          |       |      |                 |
|----------|-------|------|-----------------|
| AP1S3    | 5.58  | 1.93 | Hypermethylated |
| TNFRSF1A | 6.74  | 2.68 | Hypermethylated |
| PWWP2B   | 6.78  | 2.44 | Hypermethylated |
| PMAIP1   | 7.09  | 1.41 | Hypermethylated |
| CDC42EP1 | 7.28  | 1.62 | Hypermethylated |
| SERTAD2  | 7.88  | 2.52 | Hypermethylated |
| RUNX1    | 8.26  | 2.00 | Hypermethylated |
| PLA2R1   | 9.38  | 1.40 | Hypermethylated |
| AHNAK    | 10.10 | 1.87 | Hypermethylated |
| YAP1     | 11.07 | 1.81 | Hypermethylated |
| KCNN4    | 12.54 | 2.52 | Hypermethylated |
| ZC3H12A  | 13.30 | 2.77 | Hypermethylated |
| CFLAR    | 14.24 | 2.94 | Hypermethylated |
| ERBB2    | 14.78 | 2.29 | Hypermethylated |
| GLRX     | 14.95 | 1.68 | Hypermethylated |
| C7orf49  | 15.13 | 4.00 | Hypermethylated |
| SERINC5  | 17.72 | 4.25 | Hypermethylated |
| CASP8    | 18.56 | 3.13 | Hypermethylated |
